1

2 **Characterizing the pathogenic, genomic, and chemical traits of *Aspergillus fischeri*, the**  
3 **closest sequenced relative of the major human fungal pathogen *Aspergillus fumigatus***

4

5 Matthew E. Mead<sup>a</sup>, Sonja L. Knowles<sup>b</sup>, Huzefa A. Raja<sup>b</sup>, Sarah R. Beattie<sup>c#</sup>, Caitlin H.  
6 Kowalski<sup>c</sup>, Jacob L. Steenwyk<sup>a</sup>, Lilian P. Silva<sup>d</sup>, Jessica Chiaratto<sup>d</sup>, Laure N.A. Ries<sup>d</sup>, Gustavo  
7 H. Goldman<sup>d</sup>, Robert A. Cramer<sup>c</sup>, Nicholas H. Oberlies<sup>b</sup>, and Antonis Rokas<sup>a,\*</sup>

8

9 <sup>a</sup>Department of Biological Sciences, Vanderbilt University, Nashville, Tennessee, USA

10 <sup>b</sup>Department of Chemistry and Biochemistry, University of North Carolina at Greensboro,  
11 Greensboro, North Carolina, USA

12 <sup>c</sup>Department of Microbiology and Immunology, Geisel School of Medicine at Dartmouth,  
13 Hanover, New Hampshire, USA

14 <sup>d</sup>Faculdade de Ciências Farmacêuticas de Ribeirão Preto, Universidade de São Paulo, Brazil

15

16 Running Title: *Aspergillus fischeri* comparison with *Aspergillus fumigatus*

17 \* Address correspondence to Antonis Rokas, [Antonis.rokas@vanderbilt.edu](mailto:Antonis.rokas@vanderbilt.edu)

18 # Department of Pediatrics, University of Iowa Carver College of Medicine, Iowa City, Iowa,  
19 USA

20

21 Keywords: fungal pathogenesis, comparative genomics, and secondary metabolism

## 22 **Abstract**

23 *Aspergillus fischeri* is a very close evolutionary relative of the major cause of invasive  
24 mold infections, *Aspergillus fumigatus*. In contrast to *A. fumigatus*, *A. fischeri* rarely causes  
25 invasive disease, but why such a discrepancy between the species exists is unknown. To begin to  
26 address this question, we characterized the pathogenic, genomic, and secondary metabolic  
27 similarities and differences between *A. fischeri* and *A. fumigatus*. We observed multiple  
28 differences between the two species for phenotypes related to pathogenesis, including that *A.*  
29 *fischeri* is less virulent than *A. fumigatus* in multiple murine models of invasive disease. In  
30 contrast, ~90% of the *A. fumigatus* proteome is conserved in *A. fischeri*, including all but one of  
31 the previously known *A. fumigatus* genetic determinants important for virulence. However, the  
32 two species differed substantially in their biosynthetic gene clusters (BGCs) that are likely  
33 involved in the production of secondary metabolites, with only 10 / 33 *A. fumigatus* BGCs also  
34 conserved in *A. fischeri*. Detailed chemical characterization of *A. fischeri* cultures grown on  
35 multiple substrates identified multiple secondary metabolites, including two new compounds and  
36 one never before isolated as a natural product. Interestingly, a deletion mutant in *A. fischeri* of  
37 the ortholog of a master regulator of secondary metabolism, *laeA*, produced fewer secondary  
38 metabolites and in lower quantities, suggesting that regulation of secondary metabolism is at  
39 least partially conserved between the two species. These results suggest that the less-pathogenic  
40 *A. fischeri* possesses many of the genes important for *A. fumigatus* pathogenicity but is divergent  
41 with respect to its secondary metabolism and its ability to thrive under infection-relevant  
42 conditions.

## 43 **Importance**

44 *Aspergillus fumigatus* is the primary cause of aspergillosis, a multi-faceted and  
45 devastating disease associated with severe morbidity and mortality worldwide. *A. fischeri* is a  
46 very close relative of *A. fumigatus*, but it is rarely associated with human disease. To gain  
47 insights into the underlying causes of this remarkable difference in pathogenicity, we compared  
48 the two organisms for a range of infection-relevant biological and chemical characteristics. We  
49 found that disease progression in multiple *A. fischeri* mouse models was much slower and caused  
50 less mortality than *A. fumigatus*. The two species also exhibited different growth profiles when  
51 placed in a range of infection-relevant conditions, such as low oxygen. Interestingly, we also  
52 found that *A. fischeri* contains all but one of the genes previously identified as essential for *A.*  
53 *fumigatus* virulence. However, the two species differ significantly in their secondary metabolic  
54 pathways and profiles. The similarities and differences that we identified shed light into the  
55 evolutionary origin of a major fungal pathogen.

## 56 **Introduction**

57           Aspergillosis is a major cause of human morbidity and mortality, resulting in over  
58 200,000 life-threatening infections each year worldwide (1). Aspergillosis is primarily caused by  
59 the fungal pathogen *Aspergillus fumigatus* and most commonly affects immunocompromised  
60 patients (1). Multiple virulence traits are known for *A. fumigatus*, including thermotolerance, the  
61 ability to grow under low oxygen conditions, the ability to acquire micronutrients such as iron  
62 and zinc in limiting environments, and the ability to produce a diverse set of secondary  
63 metabolites (1, 2).

64  
65           Thermotolerance is a key trait for survival in a mammalian host and may have arisen  
66 from the need of *A. fumigatus* to survive in the warm temperatures present in one of its  
67 ecological niches, decaying compost piles (2-4). The primary route of *A. fumigatus* infection is  
68 through the lung, where oxygen levels have been observed to be as low as 2/3 of atmospheric  
69 pressure, and a successful response to this hypoxic environment is required for pathogenesis (5,  
70 6). *A. fumigatus* produces a diverse set of small molecules, termed secondary metabolites, which  
71 are biosynthesized in pathways that exist outside of primary metabolism. Some of these  
72 secondary metabolites and their regulators have been shown to be required for disease in mouse  
73 models (7-9). For example, when the nonribosomal peptide synthase (*gliP*) required for the  
74 production of the secondary metabolite gliotoxin was deleted from *A. fumigatus*, the resulting  
75 mutant strain exhibited attenuated virulence in a steroid immune suppression mouse model of  
76 aspergillosis but not in leukopenic models (10-13). Furthermore, a master regulator of secondary  
77 metabolism, *laeA*, is also required for full virulence in mouse infection studies (14, 15).

78

79 Other species closely related to *A. fumigatus* are also capable of causing disease, but they  
80 are rarely seen in the clinic (16-19). For example, *A. fischeri* is the closest evolutionary relative  
81 to *A. fumigatus* for which a genome has been sequenced 1, but it has only rarely been reported to  
82 cause disease (16). *A. fumigatus* is a member of the subgenus *Fumigati*, and while other species  
83 in this clade are rarely pathogenic, many of them have been reported to be highly resistant to  
84 antifungal drugs (20). Why these closely related species (in the case of *A. fischeri*, it is  
85 approximately 93% similar at the protein sequence level to *A. fumigatus* (21)) are unable to cause  
86 severe disease in as high of numbers as *A. fumigatus* is an open question. Non-mutually  
87 exclusive possibilities include differences in ecological abundance, lack of species level  
88 diagnosis in the clinic of disease-causing strains, and innate differences in pathogenicity between  
89 section *Fumigati* species and strains.

90  
91 However, previous studies have suggested that the differences seen in the clinic between  
92 species in the subgenus *Fumigati* are unlikely to be due to ecological factors, as several different  
93 species in the subgenus are frequently isolated from a variety of locales, including soils, fruits,  
94 and hospitals (22-24). For example, approximately 2% of the fungi isolated from the respiratory  
95 intensive care unit at Beijing Hospital were *A. fischeri* (compared to approximately 23% of  
96 fungal species identified as *A. fumigatus*) (24). Fedorova and collaborators found that when  
97 comparing the genomes of *A. fischeri*, *A. fumigatus*, and a more distantly related species (*A.*  
98 *clavatus*), 818 genes were *A. fumigatus*-specific (25). They also reported that the set of *A.*  
99 *fumigatus*-specific genes was enriched for genes involved in carbohydrate transport and  
100 catabolism, secondary metabolite biosynthesis, and detoxification relative to the genome as a

101 whole, suggesting a possible genic source for the pathogenic differences between *A. fumigatus*  
102 and *A. fischeri*.

103  
104 To gain further insight into the differences between the largely non-pathogenic *A. fischeri*  
105 and the pathogenic *A. fumigatus*, we took a multi-pronged approach to investigate phenotypic,  
106 genomic, and chemical differences between two respective strains of the two species (*A. fischeri*  
107 NRRL 181 and *A. fumigatus* CEA10). Our studies revealed that while *A. fischeri* is able to cause  
108 fatal disease in multiple mouse models of *Aspergillus* infection, its disease progression and  
109 response to multiple disease-relevant stresses is markedly different than that of the *A. fumigatus*  
110 strain examined. We also found that *A. fischeri* substantially differed from *A. fumigatus* in its  
111 secondary metabolite profile and secondary metabolite gene clusters, even though the regulation  
112 of secondary metabolism by *laeA* in *A. fischeri* closely resembled what has been observed in *A.*  
113 *fumigatus*.

114

## 115 **Results**

116 *A. fischeri* is significantly less virulent than *A. fumigatus* in multiple animal models of Invasive  
117 Pulmonary Aspergillosis (IPA).

118 Only a handful of cases of invasive fungal infections caused by *A. fischeri* have been  
119 reported in the literature (26-29). Given the scarcity of these infections as compared to *A.*  
120 *fumigatus*, we utilized two immunologically distinct murine IPA models to assess differences in  
121 virulence between the two species. In a leukopenic model, *A. fischeri* NRRL181 is significantly  
122 less virulent than *A. fumigatus* CEA10, in a dose dependent manner (Fig. 1). Using an inoculum  
123 of  $1 \times 10^5$  conidia, *A. fischeri* is completely attenuated in virulence, with 100% murine survival by

124 day 15 post-fungal challenge. In contrast, inoculation with *A. fumigatus* results in 100% murine  
125 mortality by day 15 (Fig. 1A). Using a higher dose ( $2 \times 10^6$ ) of conidia, both strains cause 90%  
126 mortality by day 14, however, the disease progression is markedly different. 80% of mice  
127 inoculated with *A. fumigatus* succumb to infection by day 4, whereas for mice inoculated with *A.*  
128 *fischeri*, the first mortality event occurs on day 5, and then one or two mice succumb each day  
129 until day 14 (Fig. 1B). Thus, despite the similar overall mortality at higher fungal challenge  
130 doses, *A. fischeri* is significantly less virulent in this model. As the patient population at risk for  
131 invasive aspergillosis continues to change (30), we also tested a non-neutropenic triamcinolone  
132 (steroid)-induced immune suppression model and observed a significant reduction in virulence of  
133 *A. fischeri* compared to *A. fumigatus* ( $p < 0.0001$  by Log-Rank and Gehan-Breslow-Wilcoxon  
134 tests). Mice inoculated with *A. fumigatus* all succumbed to infection by day 3; however, similar  
135 to the neutropenic model, animals inoculated with *A. fischeri* had a slower disease progression  
136 (Fig. 1C). We observed similar results when using the *Galleria mellonella* insect larvae model of  
137 aspergillosis infection (Fig. 1EF). Both low ( $1 \times 10^6$  conidia) and high ( $1 \times 10^9$  conidia) inoculum  
138 experiments showed significant differences between the disease progression of *A. fischeri* and *A.*  
139 *fumigatus*.

140  
141 To better understand what is happening *in vivo* during infection with *A. fischeri* and *A.*  
142 *fumigatus*, we performed histological analysis on lungs from the triamcinolone model 3 days  
143 post inoculation. Histological sections were stained with Gomori methenamine silver (GMS) to  
144 visualize fungal growth and hematoxylin and eosin (H&E) stain to visualize host cell infiltration  
145 (Fig. 1D). Overall, mice inoculated with *A. fischeri* had similar numbers of fungal lesions to  
146 those inoculated with *A. fumigatus* but the lesions caused by the two species were phenotypically

147 distinct. In large airways infected with *A. fumigatus*, there was greater fungal growth per lesion,  
148 and the growth was observed throughout the major airway itself. These lesions are accompanied  
149 by inflammation, which appears largely neutrophilic and obstructs the airways surrounding the  
150 hyphae. In the lesions containing *A. fischeri*, the fungal growth is contained to the epithelial  
151 lining of the airways. This pattern of growth is accompanied by inflammation at the airway  
152 epithelia, leaving the large airways largely unobstructed. The lack of airway obstruction during  
153 *A. fischeri* infection may contribute to the reduced virulence compared to *A. fumigatus*.

154  
155 Although the distribution of the fungal lesions varies, there is still significant fungal  
156 growth in these animals, suggesting that *A. fischeri* is capable of growing within the host. Indeed,  
157 we tested the growth rate of *A. fischeri* and *A. fumigatus* in lung homogenate as a proxy for  
158 growth capability within the nutrient environment of the host and observed no difference  
159 between the two strains (Fig. S1). These experiments show that in two murine models of IPA, *A.*  
160 *fischeri* is less virulent than *A. fumigatus*, although *A. fischeri* is still capable of causing disease  
161 using a higher dose and importantly, is able to grow within the murine host.

162  
163 *A. fischeri* is more susceptible to several infection-relevant stresses than *A. fumigatus*

164 Our *in vivo* experiments suggested that the attenuation of virulence is not solely a result  
165 of the inability of *A. fischeri* to grow within the host, therefore we hypothesized that the inability  
166 to mitigate host stress is a contributing factor to the virulence defects. Nutrient fluctuation is a  
167 stress encountered *in vivo* during *A. fumigatus* infection (31). To assess differences in metabolic  
168 plasticity between the two strains, growth was measured on media supplemented with glucose,  
169 fatty acids (Tween-80), or casamino acids. Because low oxygen tension is a significant stress



170 encountered during infection (5), and recently, fitness in low oxygen has been correlated to  
171 virulence of *A. fumigatus* (32), we measured growth of both strains at 37°C in both normoxic  
172 (ambient air) and hypoxia-inducing (0.2% O<sub>2</sub>, 5% CO<sub>2</sub>) conditions. In normoxia with glucose,  
173 fatty acids (Tween-80), or casamino acids supplied as the carbon source, radial growth of *A.*  
174 *fischeri* was lower than that of *A. fumigatus*. However, on rich media both strains grew equally  
175 well (Fig. 2). We also observed a slower growth rate of *A. fischeri* compared to *A. fumigatus* in  
176 the first 16 hours of culture in liquid media supplied with glucose at 37°C. At 30°C *A. fischeri*  
177 grew the same as, or better than, *A. fumigatus* except on Tween-80 where *A. fumigatus* has a  
178 slight advantage (Fig. S2). Also, *A. fischeri* grew substantially worse than *A. fumigatus* when  
179 grown at 44°C (Fig. S3). To determine relative fitness in hypoxic liquid environments, we  
180 measured the ratio of biomass in liquid culture in ambient air (normoxia) versus hypoxic (0.2%  
181 O<sub>2</sub>, 5%CO<sub>2</sub>) conditions. *A. fischeri* showed significantly lower fitness in hypoxia, with about an  
182 8.5-fold lower biomass than *A. fumigatus* (Fig. 3A). These data suggest that *A. fischeri* is less fit  
183 than *A. fumigatus* at 37°C and in low oxygen conditions, both of which have been shown to  
184 impact fungal virulence.

185  
186         Metabolic flexibility, or the ability for an organism to utilize multiple carbon sources  
187 simultaneously, has been suggested to provide a fitness advantage to *Candida albicans* during *in*  
188 *vivo* growth (33). Metabolic flexibility can be characterized using the glucose analog, 2-  
189 deoxyglucose (2-DG), in combination with an alternative carbon source available *in vivo* such as  
190 lactate. 2-DG triggers carbon catabolite repression, which shuts down alternative carbon  
191 utilization pathways. However, in *C. albicans* this shut down is delayed and growth occurs on  
192 lactate with 2-DG (33, 34). We tested this phenomenon in both *A. fumigatus* and *A. fischeri* and

193 observed that while both strains can grow in the presence of 2-DG on lactate, growth of *A.*  
194 *fischeri* is more inhibited under these conditions (~60%) compared to *A. fumigatus* (~35%; Fig.  
195 3B). Even under low oxygen conditions (5% and 2%), *A. fumigatus* maintains this metabolic  
196 flexibility except under extremely low oxygen conditions (0.2%), whereas *A. fischeri* is even  
197 more inhibited at all oxygen tensions of 5% or below. Thus, these data suggest that while both  
198 species exhibit some level of metabolic flexibility, *A. fumigatus* appears more metabolically  
199 flexible under a wider range of conditions than *A. fischeri*.

200  
201 Next, we measured the susceptibility of *A. fischeri* to oxidative stress, cell wall stress, and  
202 antifungal drugs. Interestingly, we observed that *A. fischeri* is more resistant to the intracellular  
203 generating oxidative stress agent menadione than *A. fumigatus* and is more susceptible to  
204 external oxidative stress agent H<sub>2</sub>O<sub>2</sub> than *A. fumigatus* (Fig. 3CD). As levels of inflammation  
205 appeared different between the species *in vivo*, we indirectly tested for differences in cell wall  
206 pathogen associated molecular patterns using cell wall perturbing agents Congo Red and  
207 Calcofluor White. For both of these agents, *A. fumigatus* was significantly more resistant than *A.*  
208 *fischeri* suggesting differences in the response to cell wall stress or in the composition and  
209 organization of the cell wall (Fig. 3C). This is especially important for host immune cell  
210 recognition and interaction and will influence pathology and disease outcome. Lastly, *A. fischeri*  
211 showed enhanced resistance relative to *A. fumigatus* for three of the four antifungal drugs tested  
212 (Table 1), similar to what has been shown in the past (35). Overall, our phenotypic data show  
213 variability in the response of *A. fischeri* to host-related stresses and antifungals. Increased growth  
214 capability in low oxygen and thermotolerance are two important attributes that likely contribute  
215 to the success of *A. fumigatus* as a pathogen compared to *A. fischeri*.

216

217 The genomes of *A. fumigatus* and *A. fischeri* are highly similar, but their secondary metabolite  
218 cluster genes are divergent

219         The large differences in virulence and virulence-related traits we observed between *A.*  
220 *fumigatus* and *A. fischeri* led us to investigate the genotypic differences that could be  
221 responsible. To describe the genomic similarities and differences between *A. fumigatus* and *A.*  
222 *fischeri*, we determined how many orthologous proteins and how many species-specific proteins  
223 were present in each genome using a Reciprocal Best BLAST Hit approach (36). We identified  
224 8,737 proteins as being shared between the two species (Fig. S4), representing 88% and 84% of  
225 the *A. fumigatus* and *A. fischeri* genomes, respectively. To narrow our search for genes that are  
226 absent in *A. fischeri* but are important for *A. fumigatus* disease, we classified 49 *A. fumigatus*  
227 genes as being genetic determinants important for virulence (Table S1) based on two previously  
228 published articles (37, 38) and extensive literature searches of our own. We observed that all but  
229 one of these pathogenicity- and virulence-associated genes were also present in *A. fischeri*, a  
230 surprising finding considering the substantial differences observed between the two species in  
231 our mouse models of infection. The virulence-associated gene not present in *A. fischeri* is *pesL*  
232 (*Afu6g12050*), a non-ribosomal peptide synthase that is essential for the synthesis of the  
233 secondary metabolite fumigaclavine C and required for virulence in the *G. mellonella* model of  
234 *A. fumigatus* infection (22, 23).

235

236         Since the only previously described *A. fumigatus* virulence associated gene not present in  
237 the *A. fischeri* genome (i.e. *pesL*) is also involved in biosynthesizing the ergot alkaloid  
238 fumigaclavine C, we investigated the differences between the repertoire of secondary metabolite

239 cluster genes present in *A. fumigatus* and *A. fischeri*. Using the program antiSMASH (39) we  
240 identified 598 secondary metabolic cluster genes distributed amongst 33 clusters in *A. fumigatus*  
241 strain CEA10 (Table S2) and 786 secondary metabolite cluster genes spread out over 48 clusters  
242 in *A. fischeri* strain NRRL 181 (Table S3). Of the 598 secondary metabolic cluster genes we  
243 identified in *A. fumigatus*, 407 of them had an ortholog that was also in an *A. fischeri* secondary  
244 metabolic gene cluster. This level of conservation between secondary metabolic cluster genes  
245 (68%) is much lower than the amount of conservation seen when considering proteins from the  
246 entire genome (88%), illustrating the rapid rate at which these metabolic pathways and genomic  
247 architectures can change and evolve.

248

249 We next sought to directly compare the list of *A. fischeri* secondary metabolic gene  
250 clusters to the list of secondary metabolic gene clusters from *A. fumigatus*. An *A. fumigatus* gene  
251 cluster was considered conserved in *A. fischeri* if 90% or more of its genes were also in an *A.*  
252 *fischeri* gene cluster. Only 10 out of the 33 *A. fumigatus* gene clusters are conserved in *A.*  
253 *fischeri* (Fig. 4), confirming our individual gene-based findings that secondary metabolism in *A.*  
254 *fumigatus* and *A. fischeri* is quite different.

255

256 While only 10 *A. fumigatus* gene clusters were conserved in *A. fischeri*, many others  
257 possessed at least one ortholog that could be found in an *A. fischeri* secondary metabolic gene  
258 cluster. However, one gene cluster (Cluster 18) was completely *A. fumigatus*-specific (i.e. it did  
259 not have any orthologs in the *A. fischeri* secondary metabolic gene clusters or in the rest of the *A.*  
260 *fischeri* genome), and antiSMASH predicted this gene cluster to produce a terpene-based  
261 metabolite. Our search for *A. fumigatus* virulence factors in *A. fischeri* revealed that *pesL*, the

262 NRPS from the fumigaclavine biosynthetic pathway, was not present in *A. fischeri*, and our  
263 expanded gene cluster search showed that only one gene from the entire fumigaclavine gene  
264 cluster is present in *A. fischeri*, again suggesting that fumigaclavine production is likely not  
265 present in *A. fischeri*. In addition, there are 10 *A. fischeri* gene clusters that do not have any  
266 orthologs in secondary metabolic gene clusters in *A. fumigatus*. One of these *A. fischeri*-specific  
267 gene clusters is responsible for making helvolic acid (a gene cluster known to be absent from the  
268 *A. fumigatus* strain CEA10 but present in strain Af293 (40)), while the other 9 have not been  
269 biochemically connected to any metabolite.

270  
271 Our analyses also showed that all the genes required for the production of the mycotoxin  
272 gliotoxin (a mycotoxin) are located in a gene cluster in *A. fischeri* (Fig. S5), and are in fact very  
273 similar to their *A. fumigatus* orthologs (41). *A. fumigatus* and *A. fischeri* gliotoxin cluster gene  
274 orthologs share on average approximately 94% of their protein sequences, a level of similarity  
275 comparable to that exhibited between all reciprocal best blast hit pairs in *A. fumigatus* and *A.*  
276 *fischeri* (93%). However, the *A. fischeri* copy of GliZ (Afu6g09630), the cluster-specific  
277 regulator of gliotoxin production in *A. fumigatus*, only shared 78% of its protein sequence with  
278 its *A. fischeri* counterpart. It is thus possible that differences in how gliotoxin cluster genes are  
279 regulated in the two species could be responsible for why *A. fischeri* is not known to produce this  
280 mycotoxin (42).

281  
282 Both the gliotoxin and acetylaszonalenin gene clusters are located immediately next to one  
283 another (Fig. S5) in *A. fischeri*. In *A. fumigatus*, the gliotoxin gene cluster is immediately next to  
284 what appears to be a version of the acetylaszonalenin cluster that is lacking portions of the

285 nonribosomal peptide synthase and acetyltransferase and the entire indole prenyltransferase  
286 required for acetylaszonalenin production. The close proximity of these two gene clusters is  
287 noteworthy, as it is another example of a rapidly evolving “super cluster” in *A. fumigatus* and *A.*  
288 *fumigatus*-related strains (43). These super clusters have been hypothesized to be “evolutionary  
289 laboratories” that may give rise to new compounds and pathways (40).

290

#### 291 Isolation and characterization of three new compounds from *A. fischeri*

292 The relatively low level of conservation we observed at the genomic loci likely  
293 responsible for secondary metabolism in *A. fumigatus* and *A. fischeri* led us to characterize the  
294 secondary metabolites *A. fischeri* produced using solid state fermentation with commercially  
295 available rice, followed by extraction and purification via HPLC (Fig. S6) (44-48). The fractions  
296 from the solid-state culture yielded three known compounds, sartorypyrone A (**1**), aszonalenin  
297 (**4**), and acetylaszonalenin (**5**) (Fig. 5A). To better explore the chemical diversity of *A. fischeri*,  
298 the one strain-many compounds (OSMAC) approach was used to alter the secondary metabolites  
299 being biosynthesized (49-52). *A. fischeri* was subsequently grown on multigrain cheerios and  
300 yielded the three secondary metabolites from rice (**1**, **4**, and **5**), and four additional secondary  
301 metabolites fumitremorgin A (**6**), fumitremorgin B (**7**), verruculogen (**8**), and the C-11 epimer of  
302 verruculogen TR2 (**9**). These results suggest that culture media influences the biosynthesis of  
303 secondary metabolites in *A. fischeri* as observed in many other fungi (50, 53).

304

305 To further explore the effect of culture conditions on secondary metabolism in *A. fischeri*,  
306 secondary metabolite production was evaluated in a suite of growth conditions, including both  
307 synthetic and rich media (Figs. 5B and S7 and Table S4) and the chemical profile was assessed

308 by Liquid Chromatography-Mass Spectrometry (LC-MS). The analysis showed that oatmeal agar  
309 (OMA) produced chromatographic peaks that were not seen in any other growth media. This  
310 finding prompted a scale-up to characterize the peaks of interest. This process yielded the seven  
311 previously isolated compounds (**1** and **4-9**) and three newly biosynthesized secondary  
312 metabolites (**2**, **3**, and **10**). Two of the secondary metabolites were new compounds  
313 (sartorypyrone E (**2**) and 14-epi-aszonapyrone A (**3**)) and one was a new natural product (13-*O*-  
314 prenyl-fumitremorgin B (**10**)) (Fig. 5B). The structures were determined using a set of  
315 spectroscopic (1 and 2D NMR) and spectrometric techniques (HRMS). Our data for  
316 sartorypyrone A (**1**) (54), aszonalenin (**4**) (55, 56), acetylaszonalenin (**5**) (54, 57), fumitremorgin  
317 A (**6**) (58, 59), fumitremorgin B (**7**) (60-62), verruculogen (**8**) (63, 64), and the C-11 epimer of  
318 verruculogen TR2 (**9**) (64) correlated well with literature values. The structures of 14-epi-  
319 aszonapyrone A (**3**), and 13-*O*-prenyl fumitremorgin B (**10**) were fully characterized in this study  
320 (see Figshare document: <https://doi.org/10.6084/m9.figshare.7149167.v1>); the structure  
321 elucidation of sartorypyrone E (**2**) is ongoing and will be reported in detail in a forthcoming  
322 manuscript in the organic chemistry literature.

323

324         Since four secondary metabolites (**5-8**) from *A. fischeri* had also been reported from *A.*  
325 *fumigatus*, we hypothesized that the mechanisms *A. fischeri* employs to regulate its secondary  
326 metabolism would also be similar to those used by *A. fumigatus*. To test this hypothesis, we  
327 constructed deletion mutants of *laeA* in *A. fischeri* (Fig. S8). LaeA is a master regulator of  
328 secondary metabolism in *A. fumigatus* and a variety of other fungi (65-67). Both the wild type  
329 and  $\Delta laeA$  strains were subjected to LC-MS analysis at a concentration of 2.0 mg/mL, and with a  
330 gradient starting at 15% CH<sub>3</sub>CN and linearly increasing to 100% CH<sub>3</sub>CN over 8 minutes. The

331 chromatographic profile of  $\Delta laeA$  showed mass data that corresponded to sartorypyrone A (1),  
332 sartorypyrone E (2), 14-epi-aszonapyrone A (3), aszonalenin (4), acetylaszonalenin (5),  
333 fumitremorgin A (6), verruculogen (8), and the C-11 epimer of verruculogen TR2 (9). However,  
334 the relative abundance of compounds present was very low compared to the wild type (Fig. 5C).  
335 Fumitremorgin B (7) and 13-*O*-prenyl-fumitremorgin B (10) were not produced by the  $\Delta laeA$   
336 mutant at all.

337

### 338 **Discussion**

339 *A. fumigatus* is an important human fungal pathogen, yet other closely related species in  
340 the subgenus *Fumigati* are either unable to cause disease or do so in very low frequencies. A  
341 number of traits that contribute to the virulence of *A. fumigatus* have been characterized, but  
342 their distribution and potential role in affecting the less prevalent diseases caused by other  
343 section *Fumigati* species is largely unknown. To begin to study how *A. fumigatus* pathogenicity  
344 may be different from the pathogenicities of other section *Fumigati* species, we thoroughly  
345 characterized *A. fischeri*, the closest sequenced relative of *A. fumigatus*, for multiple disease-  
346 relevant biological and chemical differences.

347

348 Our data suggested that *A. fischeri* strain NRRL 181 is able to grow in a mammalian host  
349 but is much less fit than *A. fumigatus* strain CEA10. Consequently, phenotypic analyses of a  
350 single strain of each species revealed significant differences in their ability to adapt to known  
351 pathogenesis-related stress environments including low oxygen, oxidative stress-inducing agents,  
352 and cell wall perturbing molecules. Moreover, basic differences in the growth of the two  
353 organisms at multiple temperatures and under multiple diverse nutrient conditions revealed



354 fundamental metabolic differences between these two strains and species. These differences in  
355 disease-relevant traits led us to look for the genomic attributes that were responsible for them.  
356 The only *A. fumigatus* gene required for virulence that was missing from *A. fischeri* was a gene  
357 encoding a nonribosomal peptide synthase required for fumigaclavine C biosynthesis (Table S1).  
358 Fumigaclavine C biosynthesis is required for *A. fumigatus* pathogenicity (68) and is a potent  
359 anti-inflammatory (69). We were surprised to see an anti-inflammatory gene missing in *A.*  
360 *fischeri* considering our histology data suggests that *A. fumigatus* recruits more inflammatory  
361 cells to sites of fungal lesions. However, additional quantitative analyses of the host immune  
362 response to these species is needed, and multiple factors contribute to the development of  
363 inflammation and host damage during infection including, but not limited to, fungal secondary  
364 metabolites. In addition, O’Hanlon et al. reported that the loss of *pesL* in *A. fumigatus* resulted in  
365 increased production of fumitremorgins; compounds similar or identical to those were isolated  
366 during our chemical study (Fig 5AB).

367  
368 Further investigations into the conservation and divergence of secondary metabolic gene  
369 clusters in *A. fischeri* and *A. fumigatus* revealed that secondary metabolic genes are much less  
370 conserved than genes in the rest of the genome. This finding is consistent with our previous  
371 results showing that secondary metabolism is a dynamic process that evolves quickly between  
372 closely related species or even between strains of the same species (40, 70). Ten gene clusters  
373 were *A. fischeri*-specific (i.e. they did not possess orthologs in the list of secondary metabolic  
374 cluster genes present in *A. fumigatus*) (Fig 3.), implying that they were either gained by *A.*  
375 *fischeri* or lost by *A. fumigatus*. A further examination of the secondary metabolic cluster gene

376 repertoire in other section *Fumigati* species is needed to discern the evolutionary pattern of these  
377 “*A. fischeri*-specific” gene clusters.

378

379 Cluster 18 was the only gene cluster found to be *A. fumigatus*-specific and contains an  
380 uncharacterized squalene-hopene cyclase, a class of enzymes that contribute to the production of  
381 molecules important for membrane fluidity in Bacteria (71). The presence of the small molecule  
382 produced by Cluster 18 in the membrane of *A. fumigatus* could contribute to its ability to evade  
383 the host immune system and/or be less susceptible to the infection-relevant stresses we tested  
384 relative to *A. fischeri*.

385

386 We report here for the first time two compounds isolated from *A. fischeri* (sartorypyrone  
387 **E (2)** and 14-epi-aszonapyrone (**3**)) in addition to the first natural production of 13-*O*-prenyl-  
388 fumitremorgin B (**10**). 13-*O*-prenyl-fumitremorgin B was previously produced *in vitro* using  
389 purified fumitremorgin B, dimethylallyl pyrophosphate, and the prenyltransferase FtmPT3  
390 (NFIA\_093400) (62), but this is the first report of its natural production and isolation from *A.*  
391 *fischeri*. Interestingly, FtmPT3 is not located in the previously described fumitremorgin cluster  
392 (72) but is located relatively near it in another predicted antiSMASH cluster (Cluster 9).

393

394 LaeA is a master regulator of secondary metabolism in a diverse set of organisms (65, 67,  
395 73), and we have shown here that it functions similarly in *A. fischeri* (Fig. 5C). Every metabolite  
396 we isolated from the wild type strain decreased in abundance in the  $\Delta laeA$  strain, and  
397 fumitremorgin B (**7**) and 13-*O*-prenyl-fumitremorgin B (**10**) were not produced by the mutant at  
398 all. Our data matches reports of *laeA* regulating fumitremorgin production in *A. fumigatus* (15,

399 74) and suggests at least a partially conserved network of *laeA* regulation in *A. fischeri*.  
400 Furthermore, our finding that *laeA* regulates the acetylaszonalenin cluster shows that this  
401 important gene controls the production of global secondary metabolism in *A. fischeri* and not  
402 only orthologs of the targets of *laeA* from *A. fumigatus*.

403

404 Together, our data suggests that *A. fischeri* is less virulent in murine models of infection  
405 than its closest sequenced relative, *A. fumigatus*, despite significant conservation between their  
406 genomes. Based on our results, we hypothesize that the decrease in virulence of *A. fischeri*  
407 relative to *A. fumigatus* is due at least in part to differences in the ability of the two organisms to  
408 respond to pathogenesis-relevant stresses and their different secondary metabolite profiles. The  
409 differences in the pathobiology traits between these two species warrant further investigation,  
410 especially as the appreciation for the health burden caused by species in the subgenus Fumigati  
411 increases. An important future direction is to expand these studies to include larger numbers of  
412 strains and species from section Fumigati in order to fully appreciate the biological and genetic  
413 diversity in this important subgenus. Leveraging this diversity will allow us to better understand  
414 the nature and evolution of human fungal pathogenesis.

415

## 416 **Materials and Methods**

### 417 Strains and growth media

418 *A. fischeri* strain NRRL 181 was acquired from the ARS Culture Collection (NRRL). All  
419 strains were maintained on glucose minimal media (GMM) from glycerol stocks stored at -80°C.  
420 All strains were grown in the presence of white light at 37°C. Conidia were collected in 0.01%  
421 Tween-80 and enumerated with a hemocytometer.

422

423 Murine virulence studies

424 For the chemotherapeutic (leukopenic) murine model, outbred CD-1 female mice  
425 (Charles River Laboratories, Raleigh, NC, USA), 6-8 weeks old, were immunosuppressed with  
426 intraperitoneal (i.p.) injections of 150 mg/kg cyclophosphamide (Baxter Healthcare Corporation,  
427 Deerfield, IL, USA) 48 hours before and 72 hours after fungal inoculation, along with  
428 subcutaneous (s.c.) injections of 40 mg/kg Kenalog-10 (triamcinolone acetonide, Bristol-Myer  
429 Squibb, Princeton, NJ, USA) 24 hours before and 6 days after fungal inoculation. For the murine  
430 triamcinolone model outbred CD-1 female mice, 6-8 weeks old, were treated with 40 mg/kg  
431 Kenalog-10 by s.c. injection 24 hours prior to fungal inoculation.

432

433 For both models, conidial suspensions of  $2 \times 10^6$  conidia were prepared in 40  $\mu$ L sterile  
434 PBS and administered to mice intranasally while under isoflourine anesthesia. Mock mice were  
435 given 40  $\mu$ L PBS. Mice were monitored three times a day for signs of disease for 14 or 18 days  
436 post-inoculation. Survival was plotted on Kaplan-Meier curves and statistical significance  
437 between curves was determined using Mantel-Cox Log-Rank and Gehan Breslow-Wilcoxon  
438 tests. Mice were housed in autoclaved cages at 4 mice per cage with HEPA filtered air and  
439 autoclaved food and water available at libitum.

440

441 *G. mellonella* virulence studies

442 *G. mellonella* larvae were obtained by breeding adult moths (Fuchs *et al.*, 2010). *G.*  
443 *mellonella* larvae of a similar size were selected (approximately 275–330 mg) and kept without  
444 food in glass container (Petri dishes), at 37°C, in darkness for 24 h prior to use. *A. fumigatus* and

445 *A. fischeri* conidia were obtained by growing on YAG media culture for 2 days. The conidia  
446 were harvested in PBS and filtered through a Miracloth (Calbiochem). The concentration of  
447 conidia was estimated by using hemocytometer, and resuspended at a concentration of  $2.0 \times 10^8$   
448 conidia/ml. The viability of the conidia was determined by incubating on YAG media culture, at  
449 37°C, 48 hours. Inoculum (5  $\mu$ l) of conidia from both strains were used to investigate the  
450 virulence of *A. fumigatus* and *A. fischeri* against *G. mellonella*. Ten *G. mellonella* in the final  
451 (sixth) instar larval stage of development were used per condition in all assays. The control  
452 group was the larvae inoculated with 5  $\mu$ l of PBS to observe the killing due to physical trauma.  
453 The inoculum was performed by using Hamilton syringe (7000.5KH) and 5  $\mu$ l into the haemocel  
454 of each larva via the last left proleg. After, the larvae were incubated in glass container (Petri  
455 dishes) at 37°C in the dark. The larval killing was scored daily. Larvae were considered dead by  
456 presenting the absence of movement in response to touch.

457

#### 458 Histopathology

459 Outbred CD-1 mice, 6-8 weeks old, were immunosuppressed and intranasally inoculated  
460 with  $2 \times 10^6$  conidia as described above for the chemotherapeutic and corticosteroid murine  
461 models. Mice were sacrificed 72 hours post inoculation. Lungs were perfused with 10% buffered  
462 formalin phosphate before removal, then stored in 10% buffered formalin phosphate until  
463 embedding. Paraffin embedded sections were stained with haematoxylin and eosin (H&E) and  
464 Gömöri methenamine silver (GMS). Slides were analyzed microscopically with a Zeiss Axioplan  
465 2 imaging microscope (Carl Zeiss Microimaging, Inc. Thornwood, NY, USA) fitted with a  
466 Qimaging RETIGA-SRV Fast 1394 RGB camera. Analysis was performed in Phylum Live 4  
467 imaging software.

468

469 Ethics Statement

470 We carried out our animal studies in strict accordance with the recommendations in the  
471 Guide for the Care and Use of Laboratory Animals of the National Research Council (Council,  
472 1996). The animal experimental protocol was approved by the Institutional Animal Care and Use  
473 Committee (IACUC) at Dartmouth College (Federal-Wide Assurance Number: A3259-01).

474

475 Growth Assays

476 Radial growth was quantified by point inoculation of  $1 \times 10^3$  conidia in  $2 \mu\text{L}$  on indicated  
477 media; plates were incubated at  $37^\circ\text{C}$  in normoxia ( $\sim 21\% \text{ O}_2$ ,  $5\% \text{ CO}_2$ ) or hypoxia ( $0.2\% \text{ O}_2$ ,  $5\%$   
478  $\text{CO}_2$ ). Colony diameter was measured every 24 hours for 4 days and reported as the average of  
479 three biological replicates per strain.

480

481 For 2-DG experiments,  $1 \times 10^3$  conidia in  $2 \text{ uL}$  were spotted on  $1\%$  lactate minimal media  
482 with or without  $0.1\%$  2-deoxyglucose (2-DG; Sigma, D8375). Plates were incubated for 3 days  
483 at  $37^\circ\text{C}$  in normoxia or hypoxia with  $5\% \text{ CO}_2$ . Percent inhibition was calculated by dividing  
484 radial growth on 2-DG plates by the average radial growth of biological triplicates on plates  
485 without 2-DG.

486

487 Fungal biomass was quantified by measuring the dry weight of fungal tissue from  $5 \times 10^7$   
488 conidia grown in  $100 \text{ mL}$  liquid GMM shaking at  $200 \text{ rpm}$  for 48 hours in normoxia ( $\sim 21\% \text{ O}_2$ )  
489 and hypoxia ( $0.2\% \text{ O}_2$ ,  $5\% \text{ CO}_2$ ). Liquid biomass is reported as the average of three biological

490 replicates per strain. Hypoxic conditions were maintained using an INVIVO<sub>2</sub> 400 Hypoxia  
491 Workstation (Ruskinn Technology Limited, Bridgend, UK) with a gas regulator and 94.8% N<sub>2</sub>.  
492

493 Liquid growth curves were performed with conidia adjusted to  $2 \times 10^4$  conidia in 20  $\mu$ L  
494 0.01% Tween-80 in 96-well dishes, then 180  $\mu$ L of media (GMM or lung homogenate) was  
495 added to each well. Plates were incubated at 37°C for 7 hours, then Abs<sub>405</sub> measurements were  
496 taken every 10 minutes for the first 16 hours of growth with continued incubation at 37°C. Lung  
497 homogenate media was prepared as follows: lungs were harvested from healthy CD-1 female  
498 mice (20-24 g) and homogenized through a 100  $\mu$ M cell strainer in 2 mL PBS/lung. Homogenate  
499 was diluted 1:4 in sterile PBS, spun down to remove cells, then filter sterilized through 22  $\mu$ M  
500 PVDF filters.

501

#### 502 Cell wall and oxidative stresses

503 Congo Red (0.5 mg/mL), Menadione (20  $\mu$ M), or calcofluor white (CFW, 25  $\mu$ g/mL)  
504 were added to GMM plates.  $1 \times 10^3$  conidia (Calcofluor white and Menadione) or  $1 \times 10^5$  conidia  
505 (Congo Red) were point inoculated and plates were incubated for 96 hours at 37°C with 5% CO<sub>2</sub>.  
506

#### 507 Orthology Determination and Analyses

508 To identify putative orthologous genes (hence forth referred to as orthologs) between *A.*  
509 *fischeri* and *A. fumigatus*, a reciprocal best BLAST hit (RBBH) approach was used. We blasted  
510 the proteome of *A. fischeri* to *A. fumigatus* and vice versa using an e-value cutoff of  $10^{-3}$  and then  
511 filtered for RBBHs according to bitscore (75). A pair of genes from each species was considered

512 orthologous if their best blast hit was to each other. Species-specific and orthologous protein sets  
513 were visualized using version 3.0.0 of eulerAPE (76).

514

515 Enriched Gene Ontology annotations were identified in gene lists using the tools  
516 available at FungiDB (77) (accessed on July 25, 2018), and lists were collapsed using the  
517 “Small” setting in REVIGO (78).

518

#### 519 Secondary Metabolism Cluster Prediction and Analyses

520 Version 4.2.0 of antiSMASH (39) was used with its default settings to identify secondary  
521 metabolite clusters. Orthologous cluster genes were identified using our RBBH results and  
522 visualized using version 0.69 of Circos (79). Syntenic clusters were visualized using easyfig  
523 version 2.2.2 (80).

524

#### 525 Secondary Metabolite Extraction and Identification

526 Secondary metabolites were extracted from *A. fischeri* using techniques well established  
527 in Natural Product literature (81, 82). This was done by adding a 1:1 mixture of CHCl<sub>3</sub>:CH<sub>3</sub>OH  
528 and left to shake overnight. The resulting slurry was partitioned twice, first with a 4:1:5  
529 CHCl<sub>3</sub>:CH<sub>3</sub>OH:H<sub>2</sub>O solution, with the organic layer drawn off and evaporated to dryness *in*  
530 *vacuo*, and secondly reconstituting 1:1:2 CH<sub>3</sub>CN:CH<sub>3</sub>OH:hexanes, where the organic layer was  
531 drawn off and evaporated to dryness. The extract then underwent chromatographic separation  
532 (flash chromatography and HPLC) using varied gradient systems. The full structural  
533 characterization of the new secondary metabolites is provided in the Figshare document  
534 (<https://doi.org/10.6084/m9.figshare.7149167.v1>).



535

536 Construction of the *A. fischeri*  $\Delta$ *laeA* mutant

537 The gene replacement cassettes were constructed by “*in vivo*” recombination in *S.*  
538 *cerevisiae* as previously described by (83, 84). Approximately 2.0 kb from the 5’-UTR and 3’-  
539 UTR flanking regions of the targeted ORF regions were selected for primer design. The primers  
540 pRS NF010750 5’fw (5’-  
541 GTAACGCCAGGGTTTTCCAGTCACGACGCAGTCTAACGCTGGGCCCTTCC-3’) and  
542 pRS NF010750 3’rv (5’-  
543 GCGGTTAACAATTTCTCTCTGGAAACAGCTACGGCGTTTGACGGCACAC-3’) contained  
544 a short homologous sequence to the Multicloning site (MCS) of the plasmid pRS426. Both the  
545 5’- and 3’-UTR fragments were PCR-amplified from *A. fischeri* genomic DNA (gDNA). The  
546 *prtA* gene, conferring resistance to pyrithiamine, which was placed within the cassette as a  
547 dominant marker, was amplified from the pPRT1 plasmid by using the primers prtA NF010750  
548 5’rv (5’-GTAATCAATTGCCCGTCTGTCAGATCCAGGTCGAGGAGGTCCAATCGG-3’)  
549 and prtA NF010750 3’fw (5’-  
550 CGGCTCATCGTCACCCCATGATAGCCGAGATCAATCTTGCATCC-3’). The deletion  
551 cassette was generated by transforming each fragment along with the plasmid pRS426 cut with  
552 *Bam*HI/*Eco*RI into the *S. cerevisiae* strain SC94721, using the lithium acetate method (85). The  
553 DNA from the transformants was extracted by the method described by Goldman et al. (86). The  
554 cassette was PCR-amplified from these plasmids utilizing TaKaRa Ex Taq™ DNA Polymerase  
555 (Clontech Takara Bio) and used for *A. fischeri* transformation according to the protocol described  
556 by Malavazi and Goldman (84). Southern blot and PCR analyses were used to demonstrate that  
557 the cassette had integrated homologously at the targeted *A. fischeri* locus. Genomic DNA from

558 *A. fischeri* was extracted by grinding frozen mycelia in liquid nitrogen and then gDNA was  
559 extracted as previously described (84). Standard techniques for manipulation of DNA were  
560 carried out as described (87). For Southern blot analysis, restricted chromosomal DNA fragments  
561 were separated on 1% agarose gel and blotted onto Hybond N<sup>+</sup> nylon membranes (GE  
562 Healthcare). Probes were labeled using [ $\alpha$ -<sup>32</sup>P]dCTP using the Random Primers DNA Labeling  
563 System (Life Technologies). Labeled membranes were exposed to X-ray films, which were  
564 scanned for image processing. Southern blot and PCR schemes are shown in Fig. S8.

565

## 566 **Acknowledgements**

567 Computational infrastructure was provided by The Advanced Computing Center for  
568 Research and Education (ACCRE) at Vanderbilt University. MEM, JS, and AR were supported  
569 by a Vanderbilt University Discovery Grant. RAC holds an Investigator in the Pathogenesis of  
570 Infectious Diseases Award supported by the Burroughs Wellcome Fund (BWF) and is also  
571 supported by a National Institute of Allergy and Infectious Diseases (NIAID) award  
572 1R01AI130128. SRB was supported, in part, by the National Institute of General Medical  
573 Sciences of the National Institutes of Health under Award Number T32GM008704. SLK was  
574 supported by the National Center for Complementary and Integrative Health, a component of the  
575 National Institutes of Health, under award number T32 AT008938.

576 **References**

- 577 1. **Latgé JP.** 1999. *Aspergillus fumigatus* and aspergillosis. *Clin Microbiol Rev* **12**:310–350.
- 578 2. **Tekaia F, Latgé J-P.** 2005. *Aspergillus fumigatus*: saprophyte or pathogen? *Current*  
579 *Opinion in Microbiology* **8**:385–392.
- 580 3. **Bhabhra R, Miley MD, Mylonakis E, Boettner D, Fortwendel J, Panepinto JC,**  
581 **Postow M, Rhodes JC, Askew DS.** 2004. Disruption of the *Aspergillus fumigatus* gene  
582 encoding nucleolar protein CgrA impairs thermotolerant growth and reduces virulence.  
583 *Infect Immun* **72**:4731–4740.
- 584 4. **Wagener J, Echtenacher B, Rohde M, Kotz A, Krappmann S, Heesemann J, Ebel F.**  
585 2008. The Putative  $\alpha$ -1,2-Mannosyltransferase AfMnt1 of the Opportunistic Fungal  
586 Pathogen *Aspergillus fumigatus* Is Required for Cell Wall Stability and Full Virulence.  
587 *Eukaryotic Cell* **7**:1661–1673.
- 588 5. **Grahl N, Puttikamonkul S, Macdonald JM, Gamcsik MP, Ngo LY, Hohl TM,**  
589 **Cramer RA.** 2011. In vivo hypoxia and a fungal alcohol dehydrogenase influence the  
590 pathogenesis of invasive pulmonary aspergillosis. *PLoS Pathog* **7**:e1002145.
- 591 6. **Willger SD, Puttikamonkul S, Kim K-H, Burritt JB, Grahl N, Metzler LJ, Barbuch**  
592 **R, Bard M, Lawrence CB, Cramer RA.** 2008. A sterol-regulatory element binding  
593 protein is required for cell polarity, hypoxia adaptation, azole drug resistance, and  
594 virulence in *Aspergillus fumigatus*. *PLoS Pathog* **4**:e1000200.
- 595 7. **Rokas A, Wisecaver JH, Lind AL.** 2018. The birth, evolution and death of metabolic  
596 gene clusters in fungi. *Nature Reviews Microbiology* **16**:150.
- 597 8. **Keller NP, Turner G, Bennett JW.** 2005. Fungal secondary metabolism — from  
598 biochemistry to genomics. *Nature Reviews Microbiology* **3**:937–947.
- 599 9. **Bignell E, Cairns TC, Throckmorton K, Nierman WC, Keller NP.** 2016. Secondary  
600 metabolite arsenal of an opportunistic pathogenic fungus. *Phil Trans R Soc B*  
601 **371**:20160023–9.
- 602 10. **Sugui JA, Pardo J, Chang YC, Zarembek KA, Nardone G, Galvez EM, Müllbacher**  
603 **A, Gallin JI, Simon MM, Kwon-Chung KJ.** 2007. Gliotoxin is a virulence factor of  
604 *Aspergillus fumigatus*: gliP deletion attenuates virulence in mice immunosuppressed with  
605 hydrocortisone. *Eukaryotic Cell* **6**:1562–1569.
- 606 11. **Spikes S, Xu R, Nguyen CK, Chamilos G, Kontoyiannis DP, Jacobson RH,**  
607 **Ejzykiewicz DE, Chiang LY, Filler SG, May GS.** 2008. Gliotoxin production in  
608 *Aspergillus fumigatus* contributes to host-specific differences in virulence. *J Infect Dis*  
609 **197**:479–486.
- 610 12. **Cramer RA, Gamcsik MP, Brooking RM, Najvar LK, Kirkpatrick WR, Patterson**  
611 **TF, Balibar CJ, Graybill JR, Perfect JR, Abraham SN, Steinbach WJ.** 2006.

- 612 Disruption of a nonribosomal peptide synthetase in *Aspergillus fumigatus* eliminates  
613 gliotoxin production. *Eukaryotic Cell* **5**:972–980.
- 614 13. **Kupfahl C, Heinekamp T, Geginat G, Ruppert T, Härtl A, Hof H, Brakhage AA.**  
615 2006. Deletion of Fmethanal the gliP gene of *Aspergillus fumigatus* results in loss of  
616 gliotoxin production but has no effect on virulence of the fungus in a low-dose mouse  
617 infection model. *Mol Microbiol* **62**:292–302.
- 618 14. **Sugui JA, Pardo J, Chang YC, Müllbacher A, Zarembek KA, Galvez EM, Brinster**  
619 **L, Zerfas P, Gallin JI, Simon MM, Kwon-Chung KJ.** 2007. Role of *laeA* in the  
620 Regulation of *alb1*, *gliP*, Conidial Morphology, and Virulence in *Aspergillus fumigatus*.  
621 *Eukaryotic Cell* **6**:1552–1561.
- 622 15. **Bok JW, Balajee SA, Marr KA, Andes D, Nielsen KF, Frisvad JC, Keller NP.** 2005.  
623 *LaeA*, a regulator of morphogenetic fungal virulence factors. *Eukaryotic Cell* **4**:1574–  
624 1582.
- 625 16. **Lamoth F.** 2016. *Aspergillus fumigatus*-Related Species in Clinical Practice. *Frontiers in*  
626 *Microbiology* **7**:683.
- 627 17. **Balajee SA, Kano R, Baddley JW, Moser SA, Marr KA, Alexander BD, Andes D,**  
628 **Kontoyiannis DP, Perrone G, Peterson S, Brandt ME, Pappas PG, Chiller T.** 2009.  
629 Molecular identification of *Aspergillus* species collected for the Transplant-Associated  
630 Infection Surveillance Network. *J Clin Microbiol* **47**:3138–3141.
- 631 18. **Alastruey-Izquierdo A, Mellado E, Peláez T, Pemán J, Zapico S, Alvarez M,**  
632 **Rodríguez-Tudela JL, Cuenca-Estrella M, FILPOP Study Group.** 2013. Population-  
633 based survey of filamentous fungi and antifungal resistance in Spain (FILPOP Study).  
634 *Antimicrob Agents Chemother* **57**:3380–3387.
- 635 19. **van der Linden JWM, Arendrup MC, Warris A, Lagrou K, Pelloux H, Hauser PM,**  
636 **Chryssanthou E, Mellado E, Kidd SE, Tortorano AM, Dannaoui E, Gaustad P,**  
637 **Baddley JW, Uekötter A, Lass-Flörl C, Klimko N, Moore CB, Denning DW,**  
638 **Pasqualotto AC, Kibbler C, Arikian-Akdagli S, Andes D, Meletiadis J, Naumiuk L,**  
639 **Nucci M, Melchers WJG, Verweij PE.** 2015. Prospective multicenter international  
640 surveillance of azole resistance in *Aspergillus fumigatus*. *Emerging Infect Dis* **21**:1041–  
641 1044.
- 642 20. **Mellado E, Alcazar-Fuoli L, García-Effrón G, Alastruey-Izquierdo A, Cuenca-**  
643 **Estrella M, Rodríguez-Tudela JL.** 2006. New resistance mechanisms to azole drugs  
644 in *Aspergillus fumigatus* and emergence of antifungal drugs-resistant *A. fumigatus* typical  
645 strains. *Med Mycol* **44**:367–371.
- 646 21. **Rokas A, Payne G, Fedorova ND, Baker SE, Machida M, Yu J, Georgianna DR,**  
647 **Dean RA, Bhatnagar D, Cleveland TE, Wortman JR, Maiti R, Joardar V, Amedeo P,**  
648 **Denning DW, Nierman WC.** 2007. What can comparative genomics tell us about species  
649 concepts in the genus *Aspergillus*? *Stud Mycol* **59**:11–17.

- 650 22. **Hong S-B, Kim D-H, Park I-C, Samson RA, Shin H-D.** 2010. Isolation and  
651 Identification of *AspergillusSection Fumigati* Strains from Arable Soil in Korea.  
652 *Mycobiology* **38**:1.
- 653 23. **Fraç M, Jezierska-Tys S, YAGUCHI T.** 2015. Occurrence, Detection, and Molecular  
654 and Metabolic Characterization of Heat- Resistant Fungi in Soils and Plants and Their  
655 Risk to Human Health *Advances in Agronomy*. Elsevier Ltd.
- 656 24. **Tong X, Xu H, Zou L, Cai M, Xu X, Zhao Z, Xiao F, Li Y.** 2017. High diversity of  
657 airborne fungi in the hospital environment as revealed by meta-sequencing-based  
658 microbiome analysis. *Sci Rep* **7**:39606.
- 659 25. **Fedorova ND, Khaldi N, Joardar VS, Maiti R, Amedeo P, Anderson MJ, Crabtree J,  
660 Silva JC, Badger JH, Albarraq A, Angiuoli S, Bussey H, Bowyer P, Cotty PJ, Dyer  
661 PS, Egan A, Galens K, Fraser-Liggett CM, Haas BJ, Inman JM, Kent R, Lemieux S,  
662 Malavazi I, Orvis J, Roemer T, Ronning CM, Sundaram JP, Sutton G, Turner G,  
663 Venter JC, White OR, Whitty BR, Youngman P, Wolfe KH, Goldman GH, Wortman  
664 JR, Jiang B, Denning DW, Nierman WC.** 2008. Genomic islands in the pathogenic  
665 filamentous fungus *Aspergillus fumigatus*. *PLoS Genet* **4**:e1000046.
- 666 26. **Summerbell RC, de Repentigny L, Chartrand C, St Germain G.** 1992. Graft-related  
667 endocarditis caused by *Neosartorya fischeri* var. *spinosa*. *J Clin Microbiol* **30**:1580–1582.
- 668 27. **Lonial S, Williams L, Carrum G, Ostrowski M, McCarthy P.** 1997. *Neosartorya*  
669 *fischeri*: an invasive fungal pathogen in an allogeneic bone marrow transplant patient.  
670 *Bone Marrow Transplant* **19**:753–755.
- 671 28. **Gerber J, Chomicki J, Brandsberg JW, Jones R, Hammerman KJ.** 1973. Pulmonary  
672 aspergillosis caused by *Aspergillus fischeri* var. *spinosa*: report of a case and value of  
673 serologic studies. *Am J Clin Pathol* **60**:861–866.
- 674 29. **Coriglione G, Stella G, Gafa L, Spata G, Oliveri S, Padhye AA, Ajello L.** 1990.  
675 *Neosartorya fischeri* var *fischeri* (Wehmer) Malloch and Cain 1972 (anamorph:  
676 *Aspergillus fischerianus* Samson and Gams 1985) as a cause of mycotic keratitis. *Eur J*  
677 *Epidemiol* **6**:382–385.
- 678 30. **Abers MS, Ghebremichael MS, Timmons AK, Warren HS, Poznansky MC, Vyas  
679 JM.** 2016. A Critical Reappraisal of Prolonged Neutropenia as a Risk Factor for Invasive  
680 Pulmonary Aspergillosis. *Open Forum Infect Dis* **3**:ofw036.
- 681 31. **Beattie SR, Mark KMK, Thammahong A, Ries LNA, Dhingra S, Caffrey-Carr AK,  
682 Cheng C, Black CC, Bowyer P, Bromley MJ, Obar JJ, Goldman GH, Cramer RA.**  
683 2017. Filamentous fungal carbon catabolite repression supports metabolic plasticity and  
684 stress responses essential for disease progression. *PLoS Pathog* **13**:e1006340–29.
- 685 32. **Kowalski CH, Beattie SR, Fuller KK, McGurk EA, Tang Y-W, Hohl TM, Obar JJ,  
686 Cramer RA.** 2016. Heterogeneity among Isolates Reveals that Fitness in Low Oxygen  
687 Correlates with *Aspergillus fumigatus* Virulence. *mBio* **7**.

- 688 33. **Childers DS, Raziunaite I, Mol Avelar G, Mackie J, Budge S, Stead D, Gow NAR,**  
689 **Lenardon MD, Ballou ER, MacCallum DM, Brown AJP.** 2016. The Rewiring of  
690 Ubiquitination Targets in a Pathogenic Yeast Promotes Metabolic Flexibility, Host  
691 Colonization and Virulence. *PLoS Pathog* **12**:e1005566.
- 692 34. **Sandai D, Yin Z, Selway L, Stead D, Walker J, Leach MD, Bohovych I, Ene IV,**  
693 **Kastora S, Budge S, Munro CA, Odds FC, Gow NAR, Brown AJP.** 2012. The  
694 evolutionary rewiring of ubiquitination targets has reprogrammed the regulation of carbon  
695 assimilation in the pathogenic yeast *Candida albicans*. *mBio* **3**.
- 696 35. **Houbraken J, Weig M, Groß U, Meijer M, Bader O.** 2016. *Aspergillus*  
697 *oerlinghausenensis*, a new mould species closely related to *A. fumigatus*. *FEMS Microbiol*  
698 *Lett* **363**:fnv236.
- 699 36. **Salichos L, Rokas A.** 2011. Evaluating ortholog prediction algorithms in a yeast model  
700 clade. *PLoS ONE* **6**:e18755.
- 701 37. **Abad A, Fernández-Molina JV, Bikandi J, Ramírez A, Margareto J, Sendino J,**  
702 **Hernando FL, Pontón J, Garaizar J, Rementeria A.** 2010. What makes *Aspergillus*  
703 *fumigatus* a successful pathogen? Genes and molecules involved in invasive aspergillosis.  
704 *Rev Iberoam Micol* **27**:155–182.
- 705 38. **Kjærboelling I, Vesth TC, Frisvad JC, Nybo JL, Theobald S, Kuo A, Bowyer P,**  
706 **Matsuda Y, Mondo S, Lyhne EK, Kogle ME, Clum A, Lipzen A, Salamov A, Ngan**  
707 **CY, Daum C, Chiniquy J, Barry K, LaButti K, Haridas S, Simmons BA, Magnuson**  
708 **JK, Mortensen UH, Larsen TO, Grigoriev IV, Baker SE, Andersen MR.** 2018.  
709 Linking secondary metabolites to gene clusters through genome sequencing of six diverse  
710 *Aspergillus* species. *Proc Natl Acad Sci USA*.
- 711 39. **Blin K, Wolf T, Chevrette MG, Lu X, Schwalen CJ, Kautsar SA, Suarez Duran HG,**  
712 **de los Santos ELC, Kim HU, Nave M, Dickschat JS, Mitchell DA, Shelest E, Breitling**  
713 **R, Takano E, Lee SY, Weber T, Medema MH.** 2017. antiSMASH 4.0—improvements  
714 in chemistry prediction and gene cluster boundary identification. *Nucleic Acids Res*  
715 **45**:W36–W41.
- 716 40. **Lind AL, Wisecaver JH, Lameiras C, Wiemann P, Palmer JM, Keller NP, Rodrigues**  
717 **F, Goldman GH, Rokas A.** 2017. Drivers of genetic diversity in secondary metabolic  
718 gene clusters within a fungal species. *PLoS Biol* **15**:e2003583.
- 719 41. **Gardiner DM, Howlett BJ.** 2005. Bioinformatic and expression analysis of the putative  
720 gliotoxin biosynthetic gene cluster of *Aspergillus fumigatus*. *FEMS Microbiol Lett*  
721 **248**:241–248.
- 722 42. **Frisvad JC, Larsen TO.** 2016. Extrolites of *Aspergillus fumigatus* and Other Pathogenic  
723 Species in *Aspergillus* Section *Fumigati*. *Frontiers in Microbiology* **6**:1485.



- 724 43. **Wiemann P, Guo C-J, Palmer JM, Sekonyela R, Wang CCC, Keller NP.** 2013.  
725 Prototype of an intertwined secondary-metabolite supercluster. *Proc Natl Acad Sci USA*  
726 **110**:17065–17070.
- 727 44. **El-Elimat T, Raja HA, Day CS, Chen W-L, Swanson SM, Oberlies NH.** 2014.  
728 Greensporones: Resorcylic Acid Lactones from an Aquatic Halenospasp. *J Nat Prod*  
729 **77**:2088–2098.
- 730 45. **El-Elimat T, Raja HA, Figueroa M, Falkinham JO, Oberlies NH.** 2014.  
731 Isochromenones, isobenzofuranone, and tetrahydronaphthalenes produced by *Paraphoma*  
732 *radicina*, a fungus isolated from a freshwater habitat. *Phytochemistry* **104**:114–120.
- 733 46. **El-Elimat T, Raja HA, Day CS, McFeeters H, McFeeters RL, Oberlies NH.** 2017.  $\alpha$ -  
734 Pyrone derivatives, tetra/hexahydroxanthones, and cyclodepsipeptides from two  
735 freshwater fungi. *Bioorg Med Chem* **25**:795–804.
- 736 47. **Raja HA, Paguigan ND, Fournier J, Oberlies NH.** 2017. Additions to <Emphasis  
737 Type="Italic">*Lindgomyces*</Emphasis> (*Lindgomycetaceae*, *Pleosporales*,  
738 *Dothideomycetes*), including two new species occurring on submerged wood from North  
739 Carolina, USA, with notes on secondary metabolite profiles. *Mycol Progress* **16**:535–552.
- 740 48. **Rivera-Chávez J, Raja HA, Graf TN, Gallagher JM, Metri P, Xue D, Pearce CJ,**  
741 **Oberlies NH.** 2017. Prelamethicin F50 and related peptaibols from *Trichoderma*  
742 *arundinaceum*: Validation of their authenticity via in situ chemical analysis. *RSC Adv*  
743 **7**:45733–45751.
- 744 49. **Sanchez JF, Somoza AD, Keller NP, Wang CCC.** 2012. Advances in *Aspergillus*  
745 secondary metabolite research in the post-genomic era. *Nat Prod Rep* **29**:351–371.
- 746 50. **Bode HB, Bethe B, Höfs R, Zeeck A.** 2002. Big effects from small changes: possible  
747 ways to explore nature's chemical diversity. *Chembiochem* **3**:619–627.
- 748 51. **Vandermolen KM, Raja HA, El-Elimat T, Oberlies NH.** 2013. Evaluation of culture  
749 media for the production of secondary metabolites in a natural products screening  
750 program. *AMB Express* **3**:71.
- 751 52. **Hemphill CFP, Sureechatchaiyan P, Kassack MU, Orfali RS, Lin W, Daletos G,**  
752 **Proksch P.** 2017. OSMAC approach leads to new fusarielin metabolites from *Fusarium*  
753 *tricinctum*. *J Antibiot* **70**:726–732.
- 754 53. **Frisvad JC, Andersen B, Thrane U.** 2008. The use of secondary metabolite profiling in  
755 chemotaxonomy of filamentous fungi. *Mycol Res* **112**:231–240.
- 756 54. **Eamvijarn A, Gomes NM, Dethoup T, Buaruang J, Manoch L, Silva A, Pedro M,**  
757 **Marini I, Roussis V, Kijjoa A.** 2013. Bioactive meroditerpenes and indole alkaloids from  
758 the soil fungus *Neosartorya fischeri* (KUFC 6344), and the marine-derived fungi  
759 *Neosartorya laciniosa* (KUFC 7896) and *Neosartorya tsunodae* (KUFC 9213).  
760 *Tetrahedron* **69**:8583–8591.

- 761 55. **Kimura Y, Hamasaki T, Nakajima H, Isogai A.** 1982. Structure of aszonalenin, a new  
762 metabolite of aspergillus zonatus. *Tetrahedron Letters* **23**:225–228.
- 763 56. **Ruchti J, Carreira EM.** 2014. Ir-Catalyzed Reverse Prenylation of 3-Substituted Indoles:  
764 Total Synthesis of (+)-Aszonalenin and (–)-Brevicompanine B. *J Am Chem Soc*  
765 **136**:16756–16759.
- 766 57. **Ellestad GA, Miranda P, Kunstmann MP.** 1973. Structure of the metabolite LL-  
767 S490.beta. from an unidentified *Aspergillus* species. *J Org Chem* **38**:4204–4205.
- 768 58. **Yamazaki M, Fujimoto H, Kawasaki T.** 1980. Chemistry of tremorogenic metabolites.  
769 I. Fumitremorgin A from *Aspergillus fumigatus*. *Chem Pharm Bull* **28**:245–254.
- 770 59. **Feng Y, Holte D, Zoller J, Umemiya S, Simke LR, Baran PS.** 2015. Total Synthesis of  
771 Verruculogen and Fumitremorgin A Enabled by Ligand-Controlled C–H Borylation. *J Am*  
772 *Chem Soc* **137**:10160–10163.
- 773 60. **Pohland AE, Schuller PL, Steyn PS, Van Egmond HP.** 1982. Physicochemical data for  
774 some selected mycotoxins. *Pure and Applied Chemistry* **54**:2219–2284.
- 775 61. **Afiyatulloev SS, Kalinovskii AI, Pivkin MV, Dmitrenok PS, Kuznetsova TA.** 2005.  
776 Alkaloids from the Marine Isolate of the Fungus *Aspergillus fumigatus*. *Chemistry of*  
777 *Natural Compounds* **41**:236–238.
- 778 62. **Mundt K, Wollinsky B, Ruan H-L, Zhu T, Li S-M.** 2012. Identification of the  
779 verruculogen prenyltransferase FtmPT3 by a combination of chemical, bioinformatic and  
780 biochemical approaches. *Chembiochem* **13**:2583–2592.
- 781 63. **Fayos J, Lokensgard D, Clardy J, Cole RJ, Kirksey JW.** 1974. Letter: Structure of  
782 verruculogen, a tremor producing peroxide from *Penicillium verruculosum*. *J Am Chem*  
783 *Soc* **96**:6785–6787.
- 784 64. **Fill TP, Asenha HBR, Marques AS, Ferreira AG, Rodrigues-Fo E.** 2013. Time course  
785 production of indole alkaloids by an endophytic strain of *Penicillium brasilianum*  
786 cultivated in rice. *Nat Prod Res* **27**:967–974.
- 787 65. **Bok JW, Keller NP.** 2004. LaeA, a regulator of secondary metabolism in *Aspergillus* spp.  
788 *Eukaryotic Cell* **3**:527–535.
- 789 66. **Hoff B, Kamerewerd J, Sigl C, Mitterbauer R, Zadra I, Kürnsteiner H, Kück U.**  
790 2010. Two components of a velvet-like complex control hyphal morphogenesis,  
791 conidiophore development, and penicillin biosynthesis in *Penicillium chrysogenum*.  
792 *Eukaryotic Cell* **9**:1236–1250.
- 793 67. **Wiemann P, Brown DW, Kleigrewe K, Bok JW, Keller NP, Humpf H-U, Tudzynski**  
794 **B.** 2010. FfVel1 and FfLae1, components of a velvet-like complex in *Fusarium fujikuroi*,  
795 affect differentiation, secondary metabolism and virulence. *Mol Microbiol* **77**:972–994.



- 796 68. **O'Hanlon KA, Gallagher L, Schrettl M, Jöchl C, Kavanagh K, Larsen TO, Doyle S.**  
797 2012. Nonribosomal Peptide Synthetase Genes *pesL* and *pesI* Are Essential for  
798 Fumigaclavine C Production in *Aspergillus fumigatus*. *Appl Environ Microbiol* **78**:3166–  
799 3176.
- 800 69. **Yu W, Pan Z, Zhu Y, An F, Lu Y.** 2017. Fumigaclavine C exhibits anti-inflammatory  
801 effects by suppressing high mobility group box protein 1 relocation and release. *European*  
802 *Journal of Pharmacology* **812**:234–242.
- 803 70. **Lind AL, Wisecaver JH, Smith TD, Feng X, Calvo AM, Rokas A.** 2015. Examining  
804 the evolution of the regulatory circuit controlling secondary metabolism and development  
805 in the fungal genus *Aspergillus*. *PLoS Genet* **11**:e1005096.
- 806 71. **Sáenz JP, Grosser D, Bradley AS, Lagny TJ, Lavrynenko O, Broda M, Simons K.**  
807 2015. Hopanoids as functional analogues of cholesterol in bacterial membranes. *Proc Natl*  
808 *Acad Sci USA* **112**:11971–11976.
- 809 72. **Li S-M.** 2010. Genome mining and biosynthesis of fumitremorgin-type alkaloids in  
810 ascomycetes. *J Antibiot* **64**:45–49.
- 811 73. **Kale SP, Milde L, Trapp MK, Frisvad JC, Keller NP, Bok JW.** 2008. Requirement of  
812 *LaeA* for secondary metabolism and sclerotial production in *Aspergillus flavus*. *Fungal*  
813 *Genetics and Biology* **45**:1422–1429.
- 814 74. **Perrin RM, Fedorova ND, Bok JW, Cramer RA, Wortman JR, Kim HS, Nierman**  
815 **WC, Keller NP.** 2007. Transcriptional regulation of chemical diversity in *Aspergillus*  
816 *fumigatus* by *LaeA*. *PLoS Pathog* **3**:e50.
- 817 75. **Madden T.** 2013. The BLAST Sequence Analysis Tool. *In* *The NCBI Handbook*  
818 [Internet]. 2nd edition. National Center for Biotechnology Information (US).
- 819 76. **Micallef L, Rodgers P.** 2014. eulerAPE: Drawing Area-Proportional 3-Venn Diagrams  
820 Using Ellipses. *PLoS ONE* **9**:e101717–18.
- 821 77. **Stajich JE, Harris T, Brunk BP, Brestelli J, Fischer S, Harb OS, Kissinger JC, Li W,**  
822 **Nayak V, Pinney DF, Stoeckert CJ, Roos DS.** 2012. FungiDB: an integrated functional  
823 genomics database for fungi. *Nucleic Acids Res* **40**:D675–81.
- 824 78. **Supek F, Bošnjak M, Škunca N, Šmuc T.** 2011. REVIGO summarizes and visualizes  
825 long lists of gene ontology terms. *PLoS ONE* **6**:e21800.
- 826 79. **Krzywinski M, Schein J, Birol I, Connors J, Gascoyne R, Horsman D, Jones SJ,**  
827 **Marra MA.** 2009. Circos: an information aesthetic for comparative genomics. *Genome*  
828 *Res* **19**:1639–1645.
- 829 80. **Sullivan MJ, Petty NK, Beatson SA.** 2011. Easyfig: a genome comparison visualizer.  
830 *Bioinformatics* **27**:1009–1010.

- 831 81. **El-Elimat T, Figueroa M, Ehrmann BM, Cech NB, Pearce CJ, Oberlies NH.** 2013.  
832 High-resolution MS, MS/MS, and UV database of fungal secondary metabolites as a  
833 dereplication protocol for bioactive natural products. *J Nat Prod* **76**:1709–1716.
- 834 82. **Paguigan ND, El-Elimat T, Kao D, Raja HA, Pearce CJ, Oberlies NH.** 2017.  
835 Enhanced dereplication of fungal cultures via use of mass defect filtering. *J Antibiot*  
836 **70**:553–561.
- 837 83. **Colot HV, Park G, Turner GE, Ringelberg C, Crew CM, Litvinkova L, Weiss RL,**  
838 **Borkovich KA, Dunlap JC.** 2006. A high-throughput gene knockout procedure for  
839 *Neurospora* reveals functions for multiple transcription factors. *Proc Natl Acad Sci USA*  
840 **103**:10352–10357.
- 841 84. **Malavazi I, Goldman GH.** 2012. Gene disruption in *Aspergillus fumigatus* using a PCR-  
842 based strategy and in vivo recombination in yeast. *Methods Mol Biol* **845**:99–118.
- 843 85. **Schiestl RH, Gietz RD.** 1989. High efficiency transformation of intact yeast cells using  
844 single stranded nucleic acids as a carrier. *Curr Genet* **16**:339–346.
- 845 86. **Goldman GH, Reis Marques dos E, Duarte Ribeiro DC, de Souza Bernardes LA,**  
846 **Quiapin AC, Vitorelli PM, Savoldi M, Semighini CP, de Oliveira RC, Nunes LR,**  
847 **Travassos LR, Puccia R, Batista WL, Ferreira LE, Moreira JC, Bogossian AP,**  
848 **Tekaia F, Nobrega MP, Nobrega FG, Goldman MHS.** 2003. Expressed sequence tag  
849 analysis of the human pathogen *Paracoccidioides brasiliensis* yeast phase: identification of  
850 putative homologues of *Candida albicans* virulence and pathogenicity genes. *Eukaryotic*  
851 *Cell* **2**:34–48.
- 852 87. **Sambrook J, Russell DW.** 2001. *Molecular Cloning*, 3rd ed. Cold Spring Harbor  
853 Laboratory Press, London.
- 854 88. **Yin W-B, Grundmann A, Cheng J, Li S-M.** 2009. Acetylaszonalenin biosynthesis in  
855 *Neosartorya fischeri*. Identification of the biosynthetic gene cluster by genomic mining  
856 and functional proof of the genes by biochemical investigation. *J Biol Chem* **284**:100–109.

857 **Tables**

858

859 **Table 1. *A. fischeri* shows enhanced resistance relative to *A. fumigatus* for several**

860 **antifungal drugs.**

| Strain              | Posaconazole<br>[ $\mu\text{g/ml}$ ] | Voriconazole<br>[ $\mu\text{g/ml}$ ] | Itraconazole<br>[ $\mu\text{g/ml}$ ] | Caspofungin<br>[ $\mu\text{g/ml}$ ] |
|---------------------|--------------------------------------|--------------------------------------|--------------------------------------|-------------------------------------|
| <i>A. fumigatus</i> | 0.7                                  | 0.8                                  | 5                                    | 0.09                                |
| <i>A. fischeri</i>  | 2.4                                  | > 4                                  | > 24                                 | 0.06                                |

861

862 **Figure Legends**

863 **Figure 1: *A. fischeri* is significantly less virulent than *A. fumigatus* in multiple models of**

864 **IPA.** AB) Cumulative survival of mice inoculated with 1e5 (A) or 2e6 (B) conidia in a  
865 leukopenic model of IPA. A) n=10/group B) n=12/group, 4/PBS. \*p=0.0098 by Log-Rank test,  
866 p=0.0002 by Gehan-Breslow-Wilcoxon test. C) Cumulative survival of mice inoculated with 2e6  
867 conidia in a triamcinolone model of IPA. n=12/group, 4/PBS. \*p=<0.0001 by Log-Rank and  
868 Gehan-Breslow-Wilcoxon tests. D) Histological sections from 3 days post inoculation in a  
869 triamcinolone model of IPA stained with H&E and GMS. Images were acquired at 100x. EF)  
870 Cumulative survival of *G. mellonella* larvae inoculated with 1e6 (E) or 1e9 (F) conidia. 10 larvae  
871 were used per condition in all assays.

872

873 **Figure 2: Radial growth curves of CEA10 (*A. fumigatus*) or NRRL181 (*A. fischeri*) at 37°C.**

874 1e3 conidia were point inoculated on each plate then plates were incubated at 37°C in normoxia  
875 (N; ~21% oxygen, 5%CO<sub>2</sub>) or hypoxia (H; 0.2% O<sub>2</sub>, 5%CO<sub>2</sub>); colony diameter was measured  
876 every 24 hours. Mean and SEM of triplicates. CAA – Casamino acids; GMM – glucose minimal  
877 media.

878

879 **Figure 3: Host-relevant stress phenotypes of *A. fumigatus* and *A. fischeri*.** A) Fitness ratio of

880 *A. fumigatus* or *A. fischeri* in hypoxia as measured by dry weight of hypoxia cultures divided by  
881 dry weight of normoxia cultures. Data represents mean and SEM of biological triplicates;  
882 \*\*\*p=0.0006 by Student's t-test. B) Growth inhibition of strains grown on 1% lactate minimal  
883 media with 0.1% 2-deoxyglucose (2-DG) under a range of low oxygen conditions. C) *A.*  
884 *fumigatus* and *A. fischeri* were grown in the presence of the cell wall perturbing agent Congo

885 Red (0.5mg/mL), the oxidative stressor Menadione (20  $\mu$ M), or the chitin perturbing agent  
886 calcofluor white (CFW, 25 $\mu$ g/mL). Plates were grown for 96 hours at 37°C and 5% CO<sub>2</sub>. For all  
887 plates except Congo Red and its GMM control, 1e3 spores were plated. For Congo red and the  
888 control GMM plate 1e5 spores were plated. Student's t-test was performed where \*: p<0.05, \*\*: p<0.01. D) Strains were grown for 48 h at 37°C in liquid complete medium supplemented with  
889 increasing concentrations of H<sub>2</sub>O<sub>2</sub>.

891  
892 **Figure 4: Secondary Metabolite Clusters of *A. fumigatus* and *A. fisheri* have diverged**  
893 **during their evolution.** Predicted secondary metabolite gene clusters are shown in the inner  
894 track, are alternatively colored dark and light gray, and their size is proportional to the number of  
895 genes in them. Black ticks on the exterior of the cluster track indicate a gene that possesses an  
896 ortholog in the other species but is not in a secondary metabolite gene cluster in the second  
897 species. White dots indicate species-specific clusters. Solid bars on the exterior correspond to the  
898 chromosome on which the clusters below them reside. Genes are connected to their orthologs in  
899 the other species with dark lines if >90% of the cluster genes in *A. fumigatus* are conserved in the  
900 same cluster in *A. fisheri*. Lighter lines connect all other orthologs that are present in both  
901 species' sets of secondary metabolite clusters. Image was made using Circos version 0.69-4 (79).

902  
903 **Figure 5: Secondary metabolite production in *A. fisheri*.** A) Compounds isolated from *A.*  
904 *fisheri*: (1) sartorypyrone A, (2) sartorypyrone E, (3) 14-epimer aszonapyrone A, (4)  
905 aszonalenin, (5) acetylaszonalenin, (6) fumitremorgin A, (7) fumitremorgin B, (8) verruculogen,  
906 (9) C-11 epimer verruculogen TR2, and (10) 13-*O*-prenyl-fumitremorgin B. The color coding  
907 indicates which putative class the molecule belongs to; e.g., terpenes, PKS, or NRPS. B) Top,

908 *Aspergillus fischeri* was initially grown on rice for two weeks, and then extracted using methods  
909 outlined in Fig. S6. The rice culture yielded compounds **1**, **4**, and **5**. Middle, *A. fischeri* was  
910 grown on multigrain Cheerios for two weeks, which yielded compounds **1** and **4-9**. Bottom, *A.*  
911 *fischeri* on Quaker oatmeal for two weeks. All compounds that were previously isolated in rice  
912 and multigrain cheerios cultures in addition to three new compounds (**2**, **3**, and **10**) were found in  
913 the oatmeal culture. All pictures depict fungi growing in 250 mL Erlenmeyer flasks; left panel  
914 indicates top view, while the right panel shows bottom view. All chromatographic profiles have  
915 been normalized to the highest  $\mu$ AU value. C) *Aspergillus fischeri* WT and  $\Delta laeA$  were grown on  
916 solid breakfast oatmeal for two weeks and extracted using organic solvents as indicated  
917 previously. The crude de-sugared and de-fatted extracts were run using UPLC-MS at a  
918 concentration of 2 mg/mL with 5  $\mu$ L being injected for analysis. The chromatographic profiles  
919 were normalized to the highest  $\mu$ AU value. Mass spec analysis indicated the presence of  
920 secondary metabolites **1-10** within the wild type, and only **1-6**, **8**, and **9** were seen in the  $\Delta laeA$   
921 mutant. All pictures show *A. fischeri* grown on oatmeal agar in Petri plates.

922 **Supplementary Material**

923 **Figure S1: Early growth in glucose minimal media (GMM) and lung homogenate media.** *A.*

924 *fumigatus* CEA10 or *A. fischeri* NRRL181 were cultured in flat-bottom 96 well plates at  $2 \times 10^4$   
925 conidia per well. Conidia were added in a 20 $\mu$ L of 0.01% Tween-80 and media was carefully  
926 pipetted over the inoculum into each well. Lung homogenate was generated according to (31).  
927 Plates were incubated for 7 hours at 37°C before measurements at 405nm were taken every 10  
928 min. Mean and SEM of eight technical replicates; data is representative of three biological  
929 replicates.

930

931 **Figure S2: Radial growth curves of *A. fumigatus* CEA10 or *A. fischeri* NRRL181 at 30°C.**

932  $1 \times 10^3$  conidia were point inoculated on each plate then plates were incubated at 30°C in normoxia  
933 (~21% oxygen, 5%CO<sub>2</sub>); colony diameter was measured every 24 hours. Mean and SEM of  
934 triplicates. Tween-80 – 1% Tween-80 provided as sole carbon source; CAA – Casamino acids;  
935 GMM – glucose minimal media.

936

937 **Figure S3: Radial growth at 44°C.** Error bars indicate standard deviations between biological  
938 duplicates (\*\*P-value < 0.005 in a paired, equal variance student t-test).

939

940 **Figure S4: Conserved and Species-Specific Proteins.** Left, Venn diagram showing the sets of

941 *A. fischeri*-specific proteins, shared orthologous proteins, and *A. fumigatus*-specific proteins

942 encoded in each genome. Numbers below each species name indicate the total number of

943 proteins encoded in that genome. Right, Venn diagram showing the sets of *A. fischeri*-specific

944 secondary metabolite cluster proteins, shared secondary metabolite cluster genes, and *A.*

945 *fumigatus*-specific secondary metabolite cluster genes. Numbers below each species name  
946 indicate the total number of secondary metabolite cluster proteins encoded in that genome. In  
947 each diagram, circles are proportional to the number of proteins they contain.

948  
949 **Figure S5: The acetylaszonalenin and gliotoxin clusters in *A. fumigatus* and *A. fischeri* are**  
950 **located immediately next to one another.** The portions of Clusters 37 and 25 from *A. fischeri*  
951 and *A. fumigatus*, respectively, that are known to contain the previously characterized  
952 acetylaszonalenin (88) and gliotoxin (41) clusters is shown. Genes colored in shades of green are  
953 involved in the acetylaszonalenin biosynthetic pathway. Dark green, *anaPS* (nonribosomal  
954 peptide synthase). Light green, *anaAT* (acetyltransferase). Green, *anaPT* (prenyltransferase).  
955 Orange, gliotoxin biosynthetic genes. Gray arrow, syntenic gene in both species not involved in  
956 gliotoxin synthesis. Sequences that are similar to one another (based on blastn scores) are  
957 marked by gray parallelograms. Image was made using EasyFig version 2.2.2 (80).

958  
959 **Figure S6: Chemistry methods.** Approximately 60 mL of 1:1 methanol:chloroform was added  
960 to cultures of *Aspergillus fischeri* grown on solid-state fermentation for two weeks. The cultures  
961 were then chopped thoroughly with a large scalpel and shaken for 16 hours using an orbital  
962 shaker. The liquid culture was then vacuum filtered and concentrated using 90 mL chloroform  
963 and 150 mL water and transferred into a separatory funnel. The chloroform (bottom) layer was  
964 drawn off and evaporated to dryness. The dried, de-sugared extract was reconstituted in 100 mL  
965 of 1:1 methonal:acetonitrile and 100 mL of hexane. The biphasic solution was shaken vigorously  
966 and transferred to a separatory funnel. The methonal:acetonitrile layer was evaporated to dryness  
967 under vacuum, producing a de-fatted extract. The extract was then subdivided into several peaks



968 or fractions using flash chromatography. The subfractions were further separated using HPLC  
969 until pure compounds were isolated. The pure compounds were subjected to UPLC-MS analysis  
970 to establish the molecular formula and fragmentation patterns. Finally, pure compounds were  
971 identified using both NMR analysis as well as information from UPLC-MS data.

972

973 **Figure S7: Media Study.** Base peak chromatograms as measured by LC-MS, illustrating how  
974 the chemistry profiles varied based on growth conditions. PDA + ab was used as the chemical  
975 control to observe the differences in the secondary metabolites, due to it being the media that *A.*  
976 *fischeri* is stored. There were overall no chemical differences observed between the different  
977 variations of PDA media. Each peak (which indicates different chemical entities) was observed  
978 in the three PDA variations, albeit at fluctuating intensities. SDA, PYG, and YESD produced the  
979 majority of the peaks observed in PDA, but it also lacked some observed peaks, indicating that  
980 these growth conditions were not chemically favored. CYA produced the majority of the peaks,  
981 as well as an additional peak that was observed at a much lower intensity in PDA. However, this  
982 peak was similarly observed in OMA. OMA produced similar peaks to those observed in PDA,  
983 but with higher intensity. Due to this, OMA was selected to further study. The gray boxes  
984 indicate differences in the observed peaks compared to PDA. See Figshare document  
985 (<https://doi.org/10.6084/m9.figshare.7149167.v1>) for more information.

986

987 **Figure S8: Southern blot confirming  $\Delta laeA$  mutant.** A 1kb probe recognizes a single DNA  
988 band (~4.4kb) in the wild type strain and a single DNA band (~2.7kb) in the  $\Delta laeA$  mutant.

989

990 **Table S1: Virulence genes in *A. fumigatus* and *A. fischeri*.**

991

992 **Table S2: Bioinformatically predicted secondary metabolite clusters in *A. fumigatus* strain**

993 **CEA10.**

994

995 **Table S3: Bioinformatically predicted secondary metabolite clusters in *A. fischeri* strain**

996 **NRRL 181.**

997

998 **Table S4: Different Types of Growth Media used for *Aspergillus fischeri*.**

# Figure 1

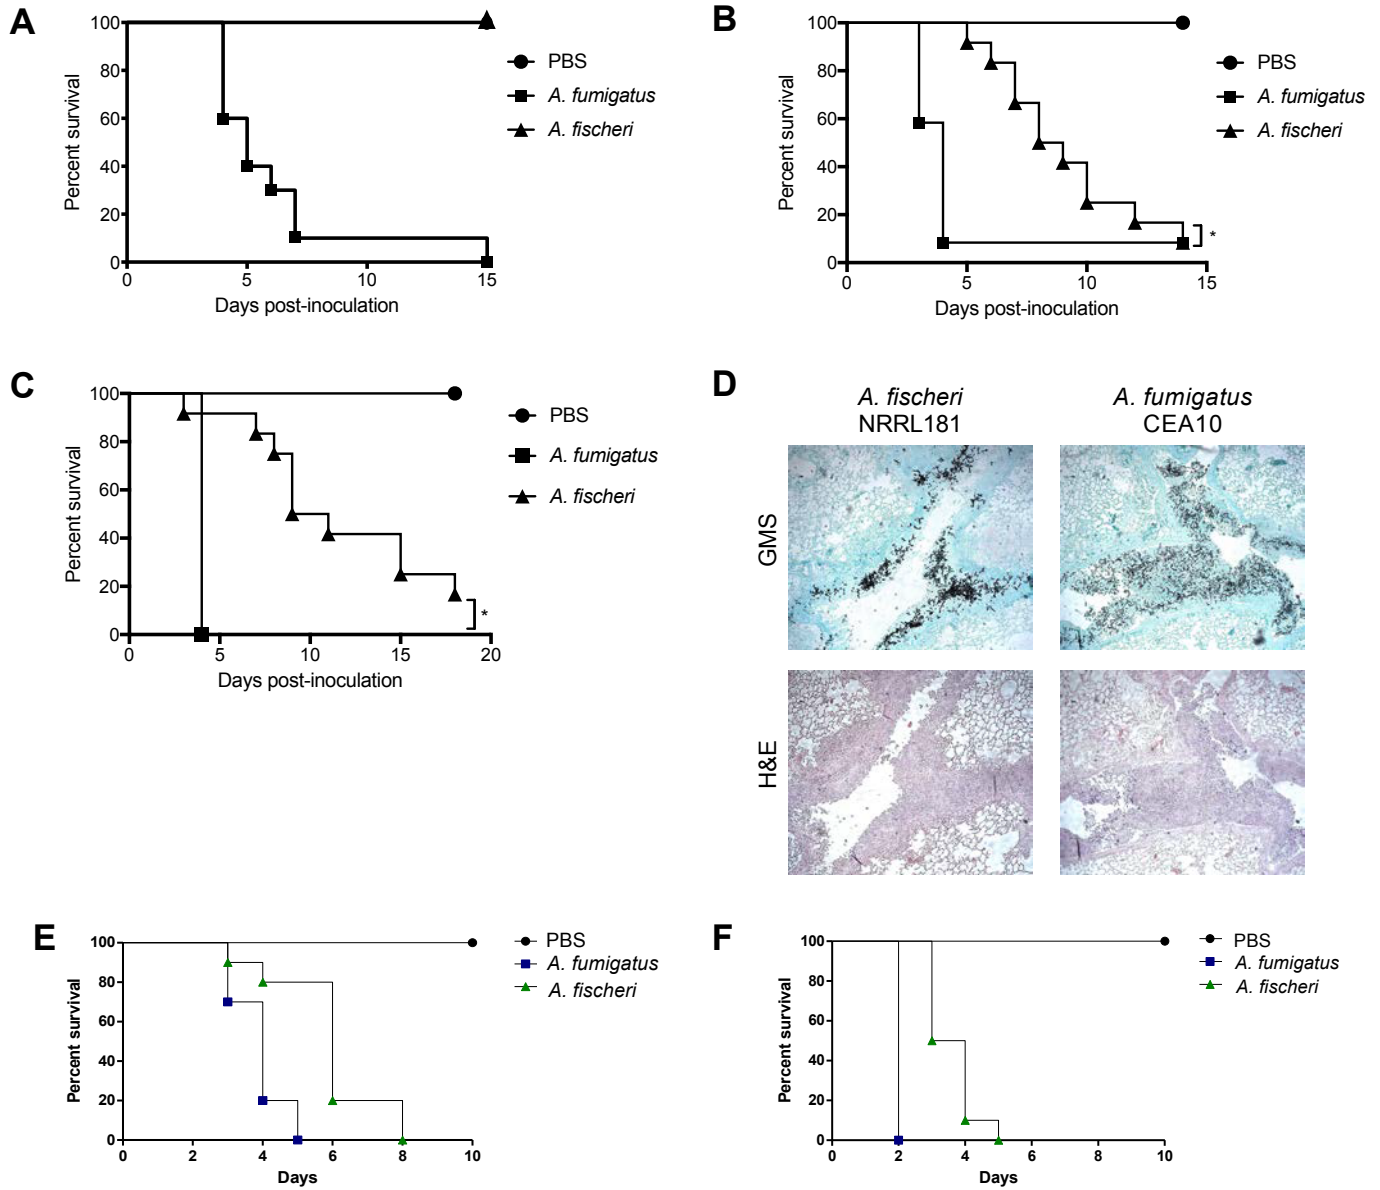

## Figure 2

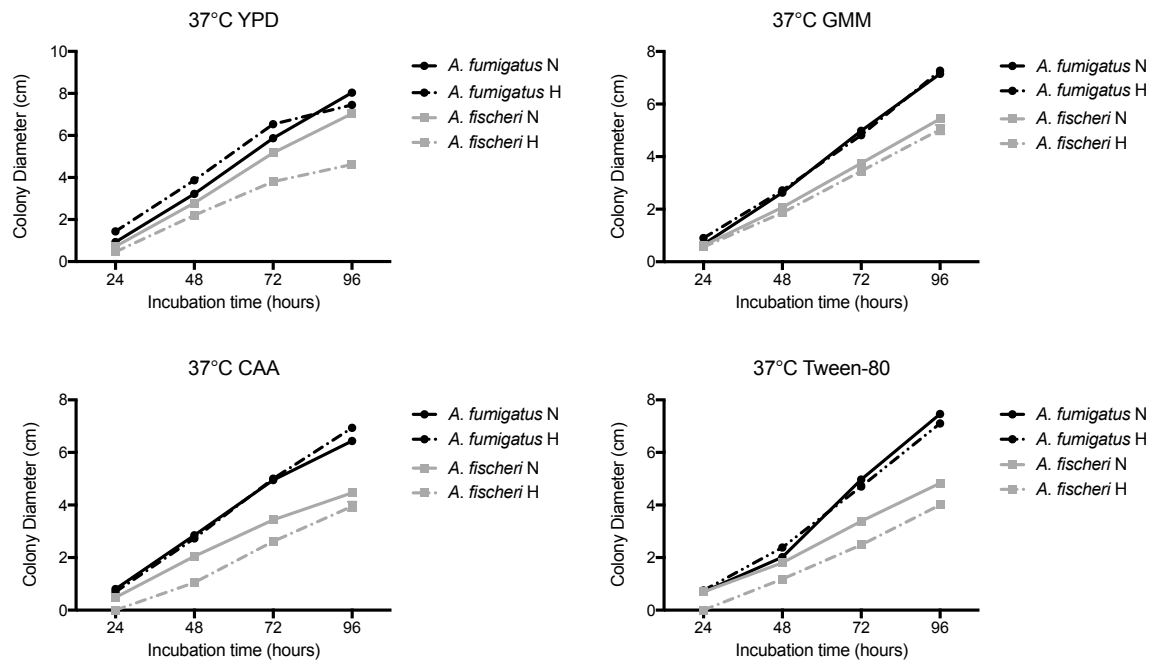

## Figure 3

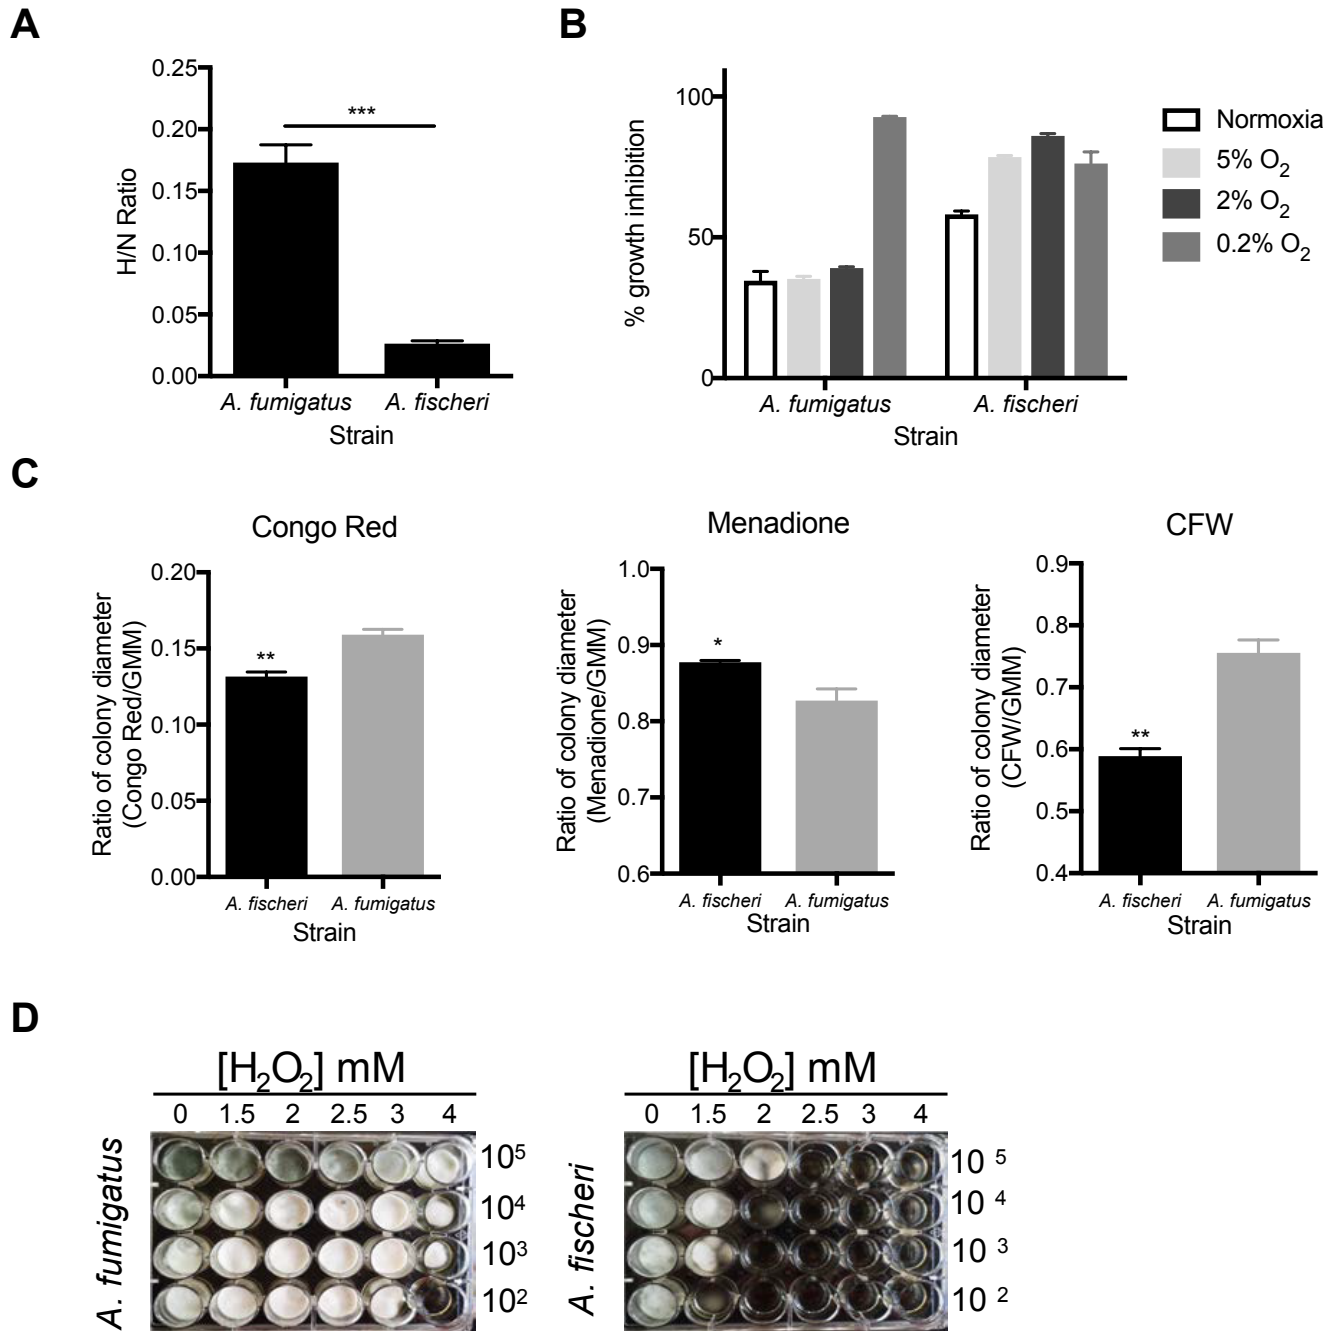

Figure 4

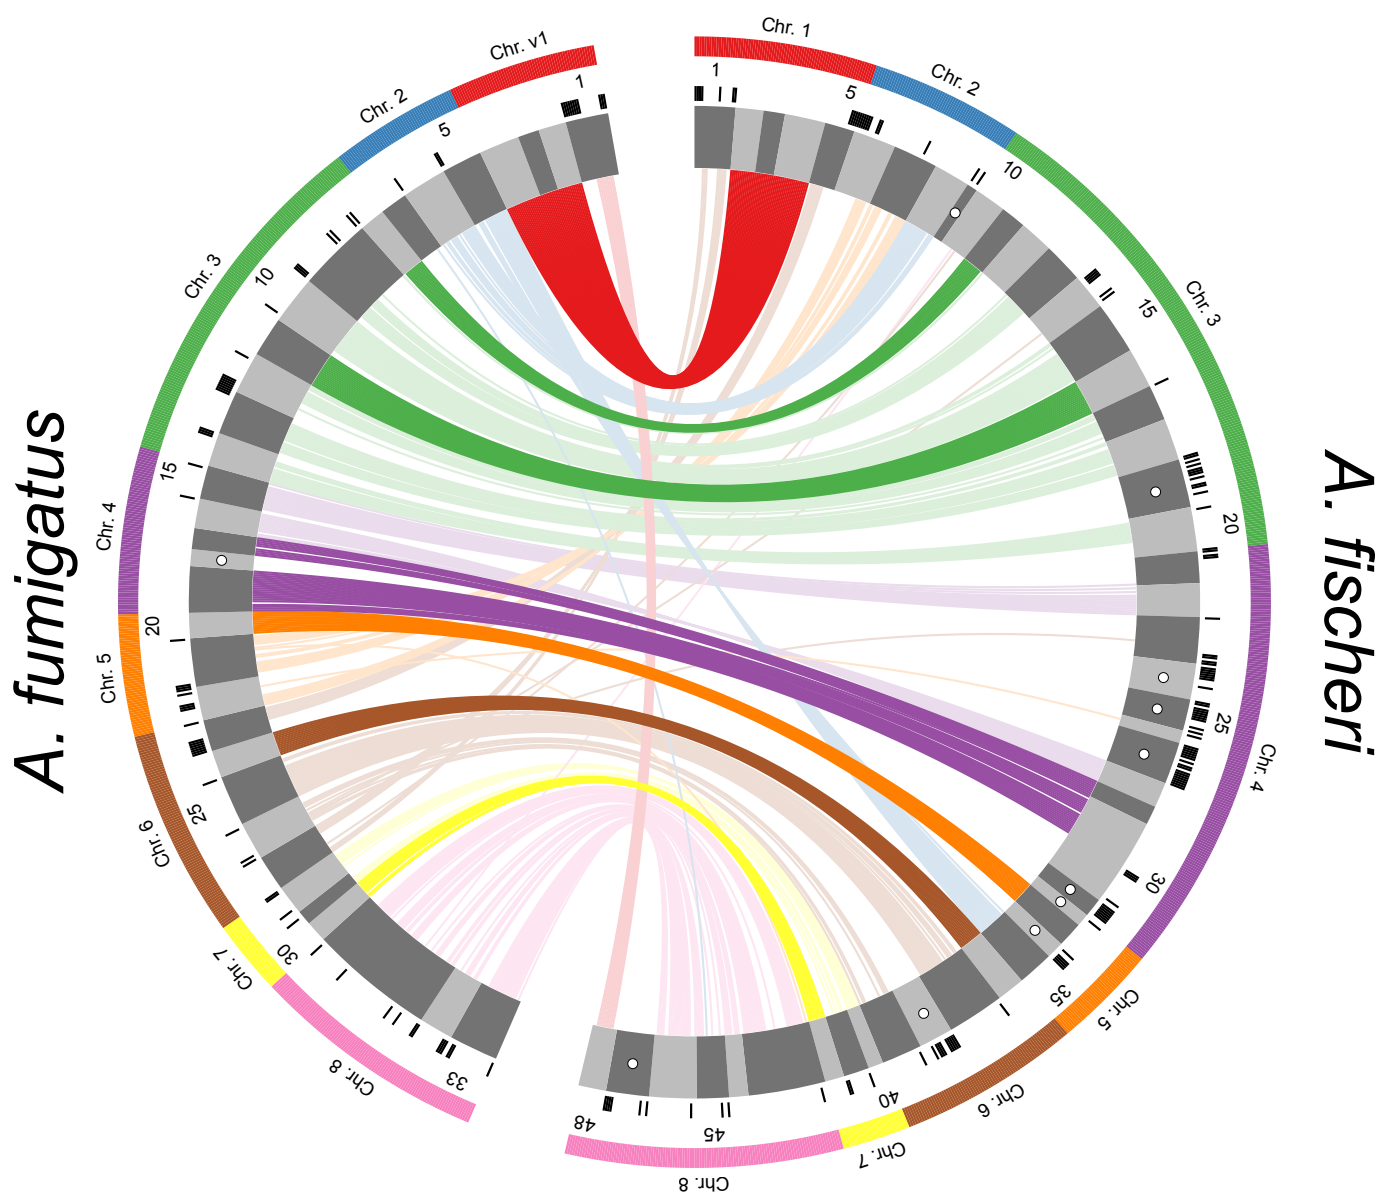

# Figure 5

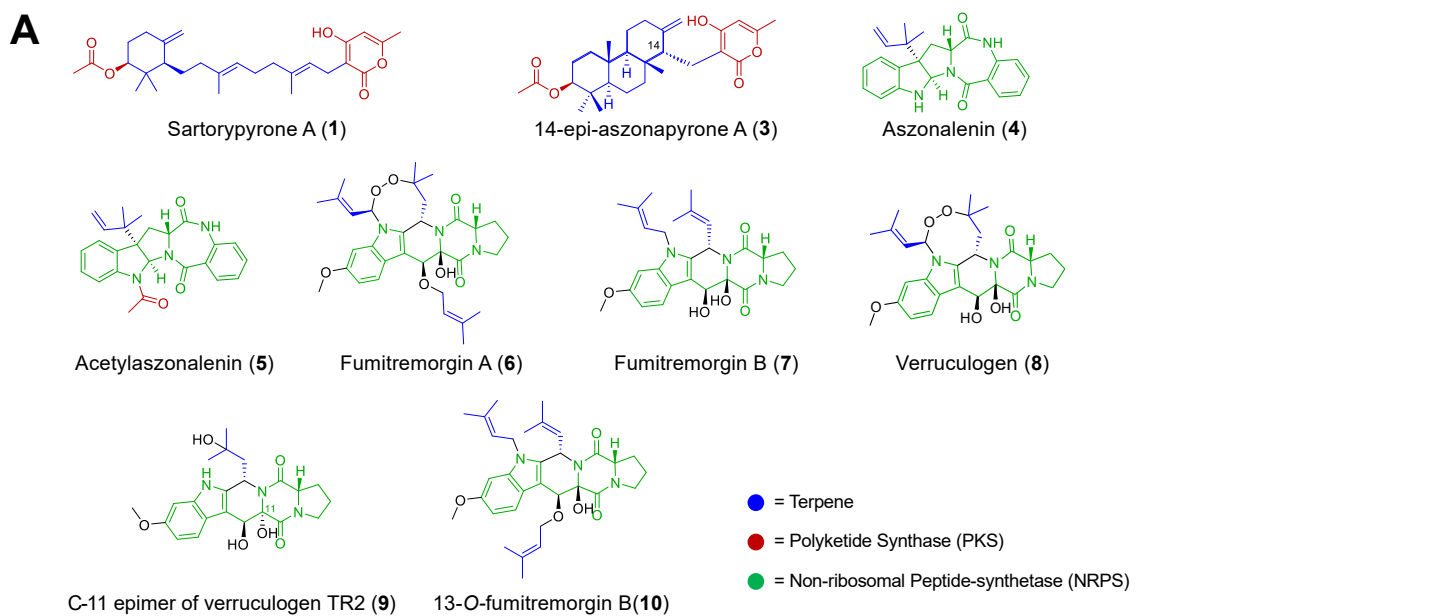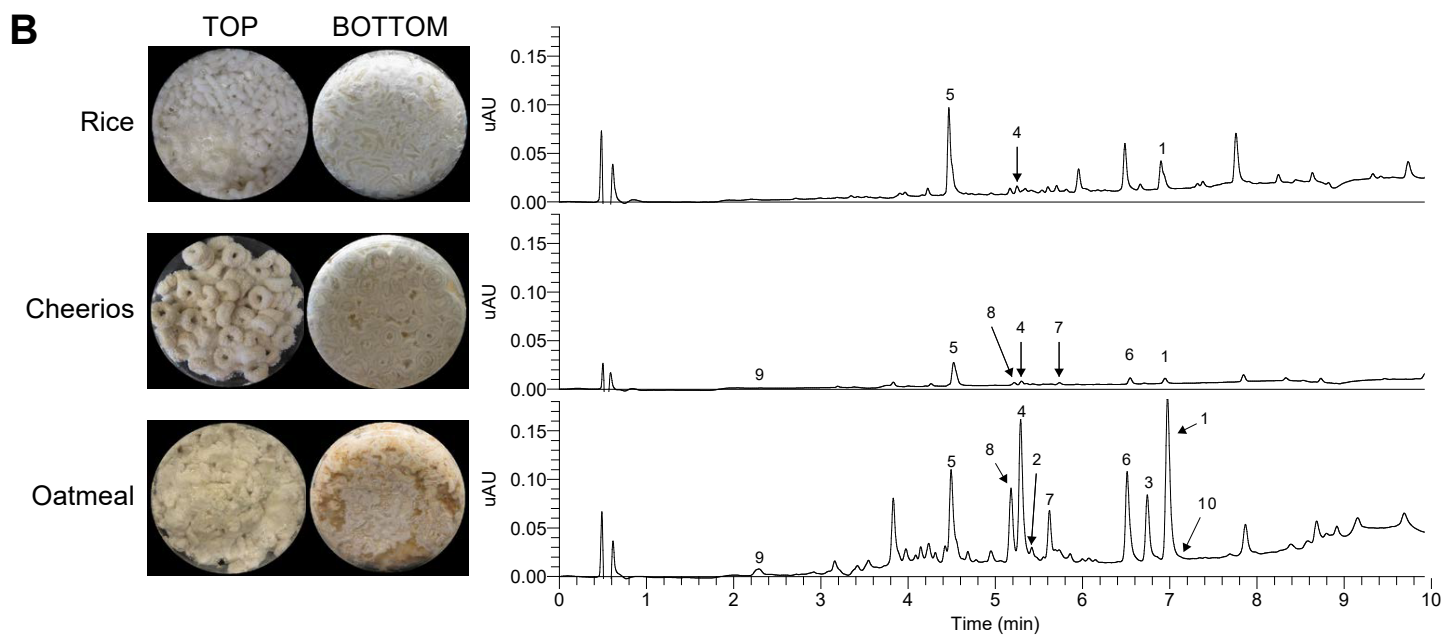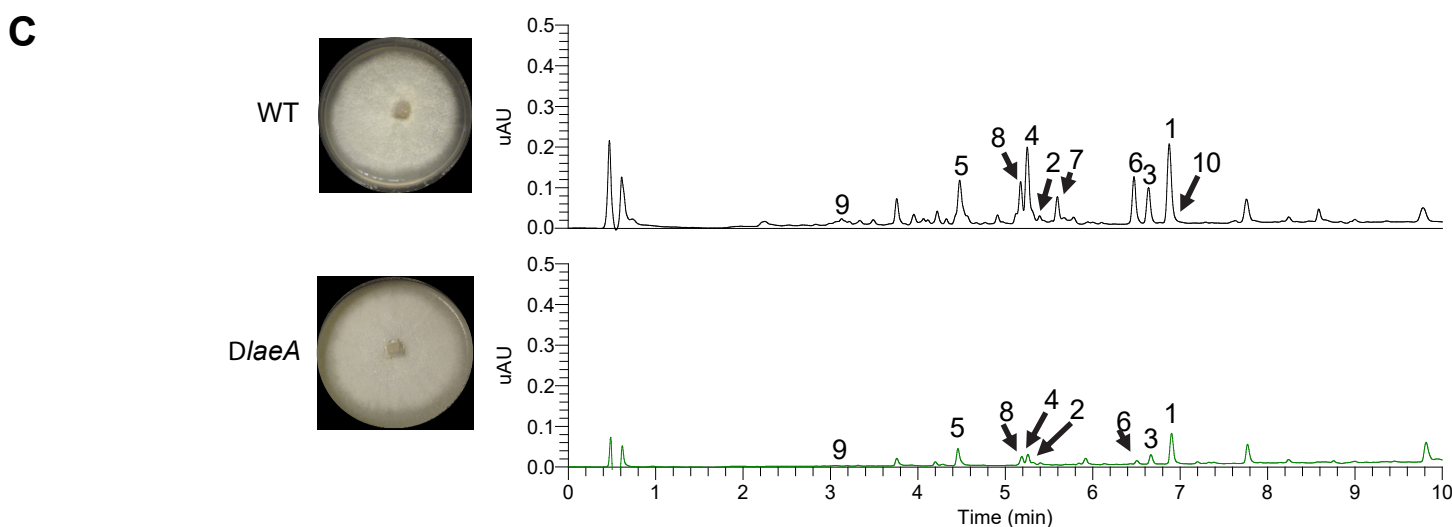

Source: https://www.biorxiv.org/content/10.1101/430728v1.full.pdf
